# Supplementary material for: Disease modeling of pulmonary fibrosis using human pluripotent stem cell-derived alveolar organoids
Source: PubMed Central journal article supplement (PMC8693665; doi:10.1016/j.stemcr.2021.10.015), 2021-11-18
Supplement: mmc5.pdf [file mmc5.pdf]

## Disease modeling of pulmonary fibrosis using human pluripotent stem cell-derived alveolar organoids

Takahiro Suezawa,<sup>1,2</sup> Shuhei Kanagaki,<sup>2</sup> Keita Moriguchi,<sup>2</sup> Atsushi Masui,<sup>1,2</sup> Kazuhisa Nakao,<sup>2</sup> Masayasu Toyomoto,<sup>1,3</sup> Koji Tamai,<sup>4</sup> Ryuta Mikawa,<sup>4</sup> Toyohiro Hirai,<sup>4</sup> Koji Murakami,<sup>2</sup> Masatoshi Hagiwara,<sup>3</sup> and Shimpei Gotoh<sup>1,4,\*</sup>

<sup>1</sup>Department of Drug Discovery for Lung Diseases, Graduate School of Medicine, Kyoto University, Kyoto, Japan

<sup>2</sup>Watarase Research Center, Kyorin Pharmaceutical Co., Ltd., Shimotsuga-gun, Tochigi, Japan

<sup>3</sup>Department of Anatomy and Developmental Biology, Graduate School of Medicine, Kyoto University, Kyoto, Japan

<sup>4</sup>Department of Respiratory Medicine, Graduate School of Medicine, Kyoto University, Kyoto, Japan

\*Correspondence: [gotoh.shimpei.5m@kyoto-u.ac.jp](mailto:gotoh.shimpei.5m@kyoto-u.ac.jp)

<https://doi.org/10.1016/j.stemcr.2021.10.015>

### SUMMARY

Although alveolar epithelial cells play a critical role in the pathogenesis of pulmonary fibrosis, few practical *in vitro* models exist to study them. Here, we established a novel *in vitro* pulmonary fibrosis model using alveolar organoids consisting of human pluripotent stem cell-derived alveolar epithelial cells and primary human lung fibroblasts. In this human model, bleomycin treatment induced phenotypes such as epithelial cell-mediated fibroblast activation, cellular senescence, and presence of alveolar epithelial cells in abnormal differentiation states. Chemical screening performed to target these abnormalities showed that inhibition of ALK5 or blocking of integrin  $\alpha$ V $\beta$ 6 ameliorated the fibrogenic changes in the alveolar organoids. Furthermore, organoid contraction and extracellular matrix accumulation in the model recapitulated the pathological changes observed in pulmonary fibrosis. This human model may therefore accelerate the development of highly effective therapeutic agents for otherwise incurable pulmonary fibrosis by targeting alveolar epithelial cells and epithelial-mesenchymal interactions.

### INTRODUCTION

Idiopathic pulmonary fibrosis (IPF) is a chronic, progressive interstitial lung disease that is more likely to occur in the elderly. Mutations in genes related to telomere homeostasis, such as *TERT*, *TERC*, *PARN*, and *RTEL1*, are associated with an increased risk of sporadic IPF (Lederer and Martinez, 2018). Therefore, aging, or at least cellular senescence, is believed to be involved in the onset of IPF. The pathogenesis of IPF is fundamentally based on initial alveolar epithelial injury followed by fibroblast activation (Katzen and Beers, 2020). Pirfenidone and nintedanib, the only two drugs for IPF approved by the US Food and Drug Administration, mainly target fibroblasts involved in the late stage of IPF (Spagnolo et al., 2020). Thus, there still remains a need for new therapeutic drugs targeting epithelial cells involved in the early stage of IPF.

Alveolar type 2 (AT2) cells are major tissue stem cells capable of secreting pulmonary surfactant in alveoli (Barakauskas et al., 2013). They can self-renew and differentiate into alveolar type 1 (AT1) cells, which are responsible for the gas exchange in the entire human body. Several reports suggest that AT2 cells play critical roles in pulmonary fibrosis. Mutations in surfactant-related genes expressed in AT2 cells are common in familial interstitial pneumonia (Katzen and Beers, 2020). There are several reports that mice with specific damage to AT2 cells develop pulmonary fibrosis (Sisson et al., 2010; Yao et al., 2021), which sup-

ports the hypothesis that the interactions between alveolar epithelial cells and fibroblasts may contribute to fibrogenesis (Katzen and Beers, 2020).

To study these interactions, *in vitro* models such as co-cultures and organoids have been pursued (Agarwal et al., 2001; Tan et al., 2019). However, these models have shown little direct evidence of the epithelial-mesenchymal interactions involved in fibroblast activation or epithelial cell damage, due to the following three limitations. First, there are few reports using functional AT2 cells as tissue stem cells that can maintain surfactant homeostasis. Instead, most studies have used airway epithelial cells because of the difficulties of long-term culture of alveolar epithelial cells. Second, the low throughput and reproducibility of existing organoid models hamper drug screening. Third, most models use mouse cells, and there are species-specific differences between humans and mice in the distal lung (Basil et al., 2020). Considering these factors, a human *in vitro* pulmonary fibrosis model that can maintain alveolar epithelial cell function and allow fibroblast crosstalk is required, as it can allow for the screening of potential targets with sufficient throughput to be feasible for drug discovery.

We previously reported a method of generating fibroblast-dependent alveolar organoids (FD-AOs) from human pluripotent stem cells (hPSCs) and primary human fetal lung fibroblasts (HFLFs) (Gotoh et al., 2014; Yamamoto et al., 2017). These organoids could be expanded in the long term, and consisted of multi-lineage epithelial cells derived from

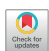

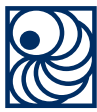

hPSCs and fibroblasts. Our previous reports on AT2 cell dysfunction associated with amiodarone (AMD)-induced and Hermansky-Pudlak syndrome type 2-related pulmonary fibrosis lacked a demonstration of the phenotypes of pulmonary fibrosis or activated fibroblasts associated with epithelial cell injury (Kanagaki et al., 2021b; Korogi et al., 2019). Here, we developed a novel pulmonary fibrosis model *in vitro* using surfactant protein C-positive (SPC<sup>+</sup>) cell-derived FD-AOs upon bleomycin (BLM) treatment. The results from our study suggest that FD-AOs could recapitulate the interactions of human alveolar epithelial cells and fibroblasts in pulmonary fibrosis *in vitro* and be useful for screening therapeutic agents to treat IPF.

## RESULTS

### BLM treatment induces contraction of FD-AOs in an epithelial cell-dependent manner

BLM, which exhibits anticancer effects through DNA double-strand breaks, causes pulmonary fibrosis as a side effect and is most commonly used as an experimental pulmonary fibrosis inducer in *in vivo* mouse models (Moeller et al., 2008). Therefore, we investigated whether treating FD-AOs with BLM could establish a model of pulmonary fibrosis. First of all, we optimized the concentration of BLM by the expression level of *CDKN1A*, an indicator of DNA damage (Cazzalini et al., 2010). The expression of *CDKN1A* was upregulated in a BLM concentration-dependent manner and persisted for 3 days after BLM removal (Figures 1A and S1A).

One of the phenotypes that indicates pulmonary fibrosis is contraction of the lung tissue, involving cell contraction of activated fibroblasts (Tomasek et al., 2002). Three-dimensional collagen gels have been widely used for analyzing the cell contraction in the fibroblast culture models (Montesano and Orci, 1988; Wilkinson et al., 2017). Since FD-AOs were encapsulated in Matrigel, which is mainly composed of laminin, collagen, and a reduced amount of growth factors, we investigated whether fibroblast activation could cause contraction of the cultivation matrix. Treating FD-AOs with BLM caused shrinkage of the matrix in a time-dependent manner (Figures 1B and 1C). To evaluate whether epithelial cells contributed to this shrinkage, we conducted control experiments on three-dimensional cultured HFLFs without epithelial cells. Interestingly, BLM-induced shrinkage occurred more strongly in the FD-AOs than in HFLF-only matrices (Figures 1D and 1E). This shrinkage was observed regardless of the clone of hPSC-derived alveolar epithelial cells or lung fibroblasts (Figures S1B–S1E). However, the presence of epithelial cells caused the cultivation matrices to shrink even without BLM.

Next, we evaluated the transcriptomes of fibroblasts under each condition (Table S1). Principal component analysis showed that the presence or absence of epithelial cells had a greater effect on overall gene expression in fibroblasts than treatment with BLM (Figure S2A), which was consistent with the matrix shrinkage. In the dimethyl sulfoxide (DMSO)-treated condition, the gene that was most strongly induced by the presence of epithelial cells was *PTCH1*, one of the major hedgehog receptors (Figure S2B). Hedgehog signaling-related genes such as *HHIP* and *GLI1* were also included in the top ten upregulated genes. Further, gene set enrichment analysis (GSEA) indicated the activation of hedgehog signaling (nominal p value = 0.0018, false discovery rate [FDR] q value = 0.068) (Figure S2C). These findings were consistent with a recent report by Zepp et al. (2021) showing that hedgehog signaling from AT1 cells was required for the induction of secondary crest myofibroblasts (SCMFs), which are described as highly contractile fibroblasts that are present during lung development. Because of the presence of AT1-like cells in our organoids (Kanagaki et al., 2021a), we assessed whether SCMF lineage markers varied depending on the presence or absence of epithelial cells. The SCMF low-expression markers, *WNT2* and *TCF21*, were decreased while the SCMF high-expression marker, *STC1*, was upregulated in the presence of epithelial cells (Figure S2D). Furthermore, the most common hedgehog ligand, *SHH*, was expressed specifically in EpCAM<sup>+</sup> cells in FD-AOs (Figure S2E), and the addition of cyclopamine, which inhibits hedgehog signaling (Chen et al., 2002), suppressed epithelial cell-dependent matrix shrinkage (Figures S2F and S2G). These results suggest that fibroblasts of FD-AOs acquire the contractile characteristics similar to those of SCMFs via hedgehog signals from epithelial cells during matrix shrinkage under the DMSO-treated condition.

Differentially expressed genes (DEGs) induced by BLM treatment in fibroblasts of FD-AOs and in HFLF-only cultures partially overlapped (Figure 1F). However, some DEGs were specifically changed in each condition. We analyzed the DEGs induced by BLM treatment only in the presence of epithelial cells (Table S1). Gene ontology (GO) enrichment analysis of biological processes showed that the pathways associated with “Response to lipid” and “Cell communication” were significantly enriched (Figure 1F). GO results indicated probable interactions between fibroblasts and epithelial cells, especially AT2 cells having lamellar bodies, which are surfactant lipid-storing organelles. Other enrichments included “Extracellular matrix organization” and “Muscle structure development.” *MYH11*, which encodes myosin heavy chain 11, has been reported to be upregulated in the lung fibroblasts of IPF and BLM model mice (Reyfman et al., 2019; Xie et al., 2018). *MYH11* was upregulated by BLM only in the

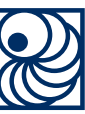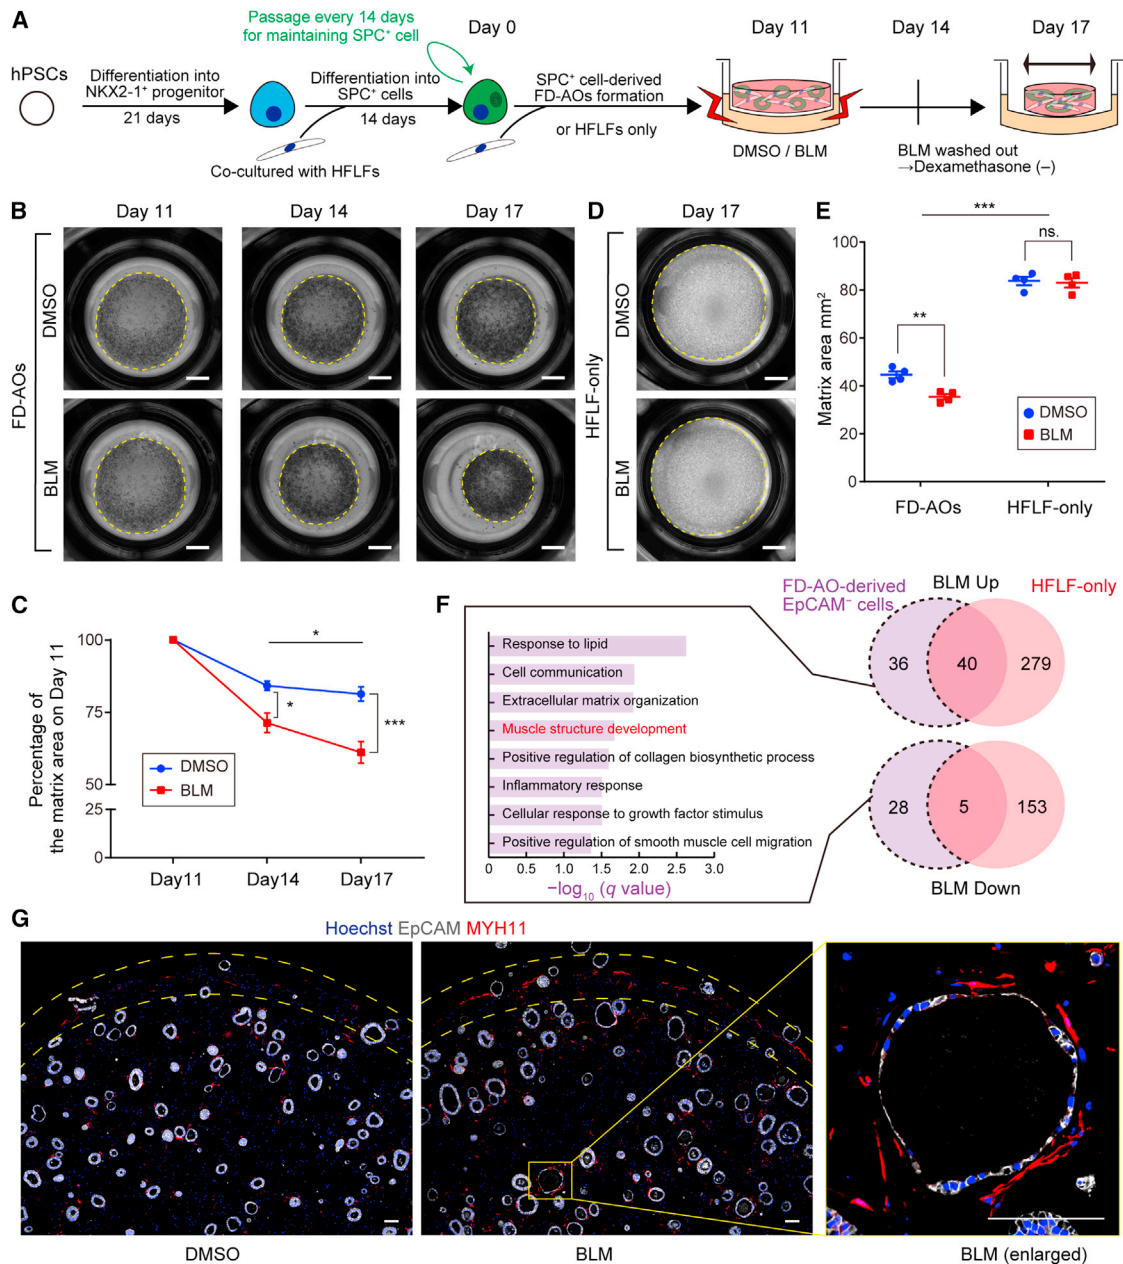

**Figure 1. Contraction of FD-AO matrices in response to BLM treatment is dependent on epithelial cells**

(A) Experimental scheme.

(B and C) Whole-well imaging and quantification of the area of cultivation matrices of FD-AOs on days 11, 14, and 17. Scale bars, 2 mm.

(D) Whole-well imaging of the matrices of HFLF-only culture. Scale bars, 2 mm.

(E) Quantification of the matrix area of FD-AOs and HFLF-only culture.

(F) GO analysis of DEGs specific to EpCAM<sup>-</sup> cells derived from BLM-treated FD-AOs. DESeq2 was used to identify the DEGs for each condition, and the threshold was set to the adjusted  $p < 0.05$  ( $n = 3$ ).

(G) IFA of cultivation matrix of FD-AOs. Gray, EpCAM; red, MYH11; blue, nuclei (Hoechst). Scale bars, 100  $\mu$ m.

Data are presented as mean  $\pm$  SEM ( $n = 4$  independent experiments). Two-way ANOVA with Sidak's multiple comparisons test: \* $p < 0.05$ , \*\* $p < 0.01$ , \*\*\* $p < 0.001$ ; ns, not significant.

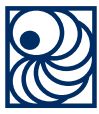

presence of epithelial cells (Table S1), and immunofluorescence analysis (IFA) showed that MYH11<sup>+</sup> fibroblasts appeared at the surrounding edge of the cultivation matrix and was preferentially observed along with spheroids in BLM-treated FD-AOs (Figure 1G). These results suggest that epithelial cells contribute to the BLM-induced fibroblast activation.

### BLM treatment induces morphological change in epithelial cells in FD-AOs

We investigated whether BLM treatment caused morphological changes in epithelial cells in FD-AOs (Figure 2A). BLM treatment increased the diameter and decreased the thickness of the alveolar spheroids (Figures 2B and 2C). Since cuboidal AT2 cells can differentiate into thin and flat-shaped AT1 cells, we hypothesized that BLM affected the stemness of AT2 cells. We then evaluated the gene expression of AT1 and AT2 cell-specific markers in FD-AOs (Figure 2D). Among AT2-specific markers, BLM treatment did not significantly change the expression of *SFTPC* but did upregulate the expression of *ABCA3*. AT1-specific markers *AQP5* and *AGER* were significantly upregulated in BLM-treated FD-AOs. Furthermore, IFA showed an enhanced expression of *AGER* in BLM-treated FD-AOs (Figure 2E).

We counted the number of EpCAM<sup>+</sup> or EpCAM<sup>-</sup> cells in BLM-treated FD-AOs to investigate whether the elevated epithelial cell markers were due to an increase in the number of epithelial cells. BLM treatment decreased the number of EpCAM<sup>+</sup> cells but did not change the number of EpCAM<sup>-</sup> cells (Figure 2F). Consistent with mRNA expression, there was no significant difference in the positive rate of SPC-GFP in EpCAM<sup>+</sup> cells (Figures 2G and 2H). These results suggest that, upon BLM treatment, the spheroid-growing capacity of AT2 cells was impaired but their differentiation status was maintained or upregulated.

We previously reported a method to culture hPSC-derived alveolar epithelial cells without feeder fibroblasts: fibroblast-free alveolar organoids (FF-AOs). We treated FF-AOs with BLM to evaluate its direct effect (Figure S3A). As with FD-AOs, the number of viable epithelial cells in FF-AOs was reduced by BLM treatment (Figure S3B). However, BLM treatment in FF-AOs decreased the diameter of alveolar spheroids and did not increase AT1-specific markers other than *CAV1* (Figures S3C–S3E). These results suggest that BLM directly disrupts alveolar epithelial cells, but the differentiation program to AT1 cells does not work in the absence of fibroblasts.

Next, since AT2 cells store surfactant lipid in lamellar bodies, we examined the ultrastructure of AT2 cells in BLM-treated FD-AOs using a transmission electron microscope. Hypertrophic lamellar bodies were noted in BLM-treated FD-AOs (Figure 2I). We previously reported that

AMD treatment induced hypertrophic lamellar bodies in alveolar epithelial cells and that LysoTracker, which binds to acidic phospholipids, stained not only AT2 cells but also the other epithelial cells and fibroblasts in AMD-treated FD-AOs (Kanagaki et al., 2021b; Yamamoto et al., 2017). However, in the present study, LysoTracker staining demonstrated that BLM treatment induced phospholipid accumulation specifically in SPC<sup>+</sup> cells in FD-AOs (Figure 2J). This preference for SPC<sup>+</sup> cells was also observed in FF-AOs (Figures S3F–S3H).

### BLM-treated FD-AOs involve AT2-AT1 intermediate-state cells

We performed RNA sequencing (RNA-seq) of isolated SPC-GFP<sup>+</sup> cells from BLM-treated FD-AOs (Table S2). Although SPC<sup>+</sup> cells are mainly AT2 cells in passaged FD-AOs, BLM treatment increased the expression of AT1 markers in SPC<sup>+</sup> cells (Figure 3A). The number of podoplanin-positive (PDPN<sup>+</sup>) cells was evaluated by flow cytometry (FCM) to address the question of whether BLM treatment affected the AT2-AT1 composition ratio in FD-AOs (Figure 3B). Although there was no significant difference in the proportion of PDPN<sup>+</sup>SPC<sup>-</sup> cells in which AT1-like cells were expected to be included, the number of PDPN<sup>-</sup>SPC<sup>+</sup> cells decreased while PDPN<sup>+</sup>SPC<sup>+</sup> cells increased slightly (Figure 3C).

Kobayashi et al. (2020) reported that AT2 cells enter an intermediate, pre-alveolar type-1 transitional cell state (PATS) during the process of differentiating into AT1 cells in mice. Several other reports also supported the presence of AT2-AT1 intermediate cells in pulmonary fibrosis and reported that such intermediate-state cells increased in IPF lungs (Choi et al., 2020; Kobayashi et al., 2020; Strunz et al., 2020). GO enrichment analysis showed that the genes annotated as “Signal transduction by p53 class mediator” and “Epithelial cell differentiation” were enriched in the top 500 DEGs between DMSO-treated and BLM-treated SPC<sup>+</sup> cells in FD-AOs (Figure 3D). Furthermore, BLM treatment increased the gene expression of the PATS markers in SPC<sup>+</sup> cells (Figure 3E). Since p53 has been reported as a key transcription factor in the induction of PATS-like cells, we evaluated the co-expression of p53 and *SFN*, a PATS marker gene that is reported to be upregulated in the IPF lung. IFA showed an increase in the number of p53<sup>+</sup>SFN<sup>+</sup> epithelial cells in BLM-treated FD-AOs, and the p53<sup>+</sup>SFN<sup>+</sup> cells appeared to express SPC-GFP weakly or not at all (Figure 3F). These results suggest that PATS-like cells could increase in BLM-treated FD-AOs.

### BLM treatment induces cellular senescence in AT2 cells

GO enrichment analysis of the DEGs in BLM-treated SPC<sup>+</sup> cells showed that genes associated with inflammation were

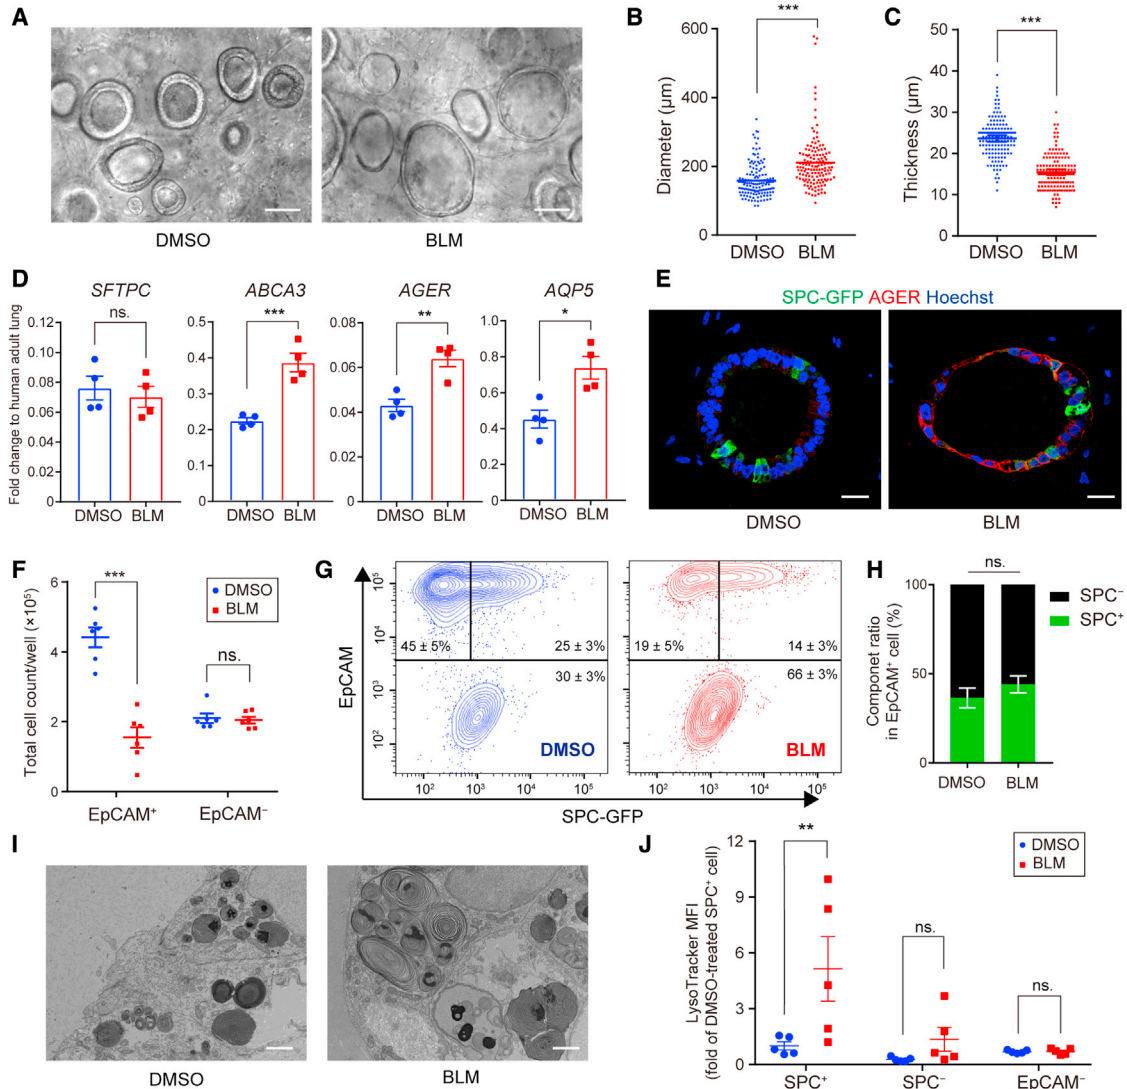

**Figure 2. BLM induces morphological change in epithelial cells in FD-AOs**

(A) Live-cell imaging of epithelial cells in BLM-treated FD-AOs. Scale bars, 100  $\mu\text{m}$ .

(B and C) Quantification of diameter and thickness of alveolar spheroids. Data are presented as mean  $\pm$  SEM ( $n = 140$  spheroids from 7 independent experiments). Unpaired two-tailed Student's  $t$  test: \*\*\* $p < 0.001$ .

(D) Expression levels of AT2 (*SFTPC*, *ABCA3*) and AT1 (*AQP5*, *AGER*) markers in FD-AOs evaluated by qRT-PCR. Gene expression in the normalizer (adult lung RNA control) was set at 1. Data are presented as mean  $\pm$  SEM ( $n = 4$ ). Unpaired two-tailed Student's  $t$  test: \* $p < 0.05$ , \*\* $p < 0.01$ , \*\*\* $p < 0.001$ ; ns, not significant.

(E) IFA of FD-AOs. Green, SPC-GFP; red, AGER; blue, nuclei (Hoechst). Scale bars, 20  $\mu\text{m}$ .

(F) Total number of EpCAM<sup>+</sup> or EpCAM<sup>-</sup> cells in a well. All dissociated cells were counted and multiplied by the ratio of EpCAM<sup>+</sup> to EpCAM<sup>-</sup> cells as quantified by FCM. Data are mean  $\pm$  SEM ( $n = 6$  independent experiments). Two-way ANOVA with Sidak's multiple comparisons test: \*\*\* $p < 0.001$ ; ns, not significant.

(G) FCM of DMSO- and BLM-treated FD-AOs.

(H) Analyses of cell component ratio of EpCAM<sup>+</sup> cells in FD-AOs using FCM. Data are presented as mean  $\pm$  SEM ( $n = 5$  independent experiments). Unpaired two-tailed Student's  $t$  test: ns, not significant.

(I) Transmission electron microscopy images of BLM-treated FD-AOs. Scale bars, 2  $\mu\text{m}$ .

(J) Mean fluorescence intensity of LysoTracker in FCM. Data are presented as mean  $\pm$  SEM ( $n = 5$  independent experiments). Two-way ANOVA with Sidak's multiple comparisons test: \*\* $p < 0.01$ ; ns, not significant.

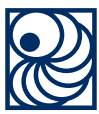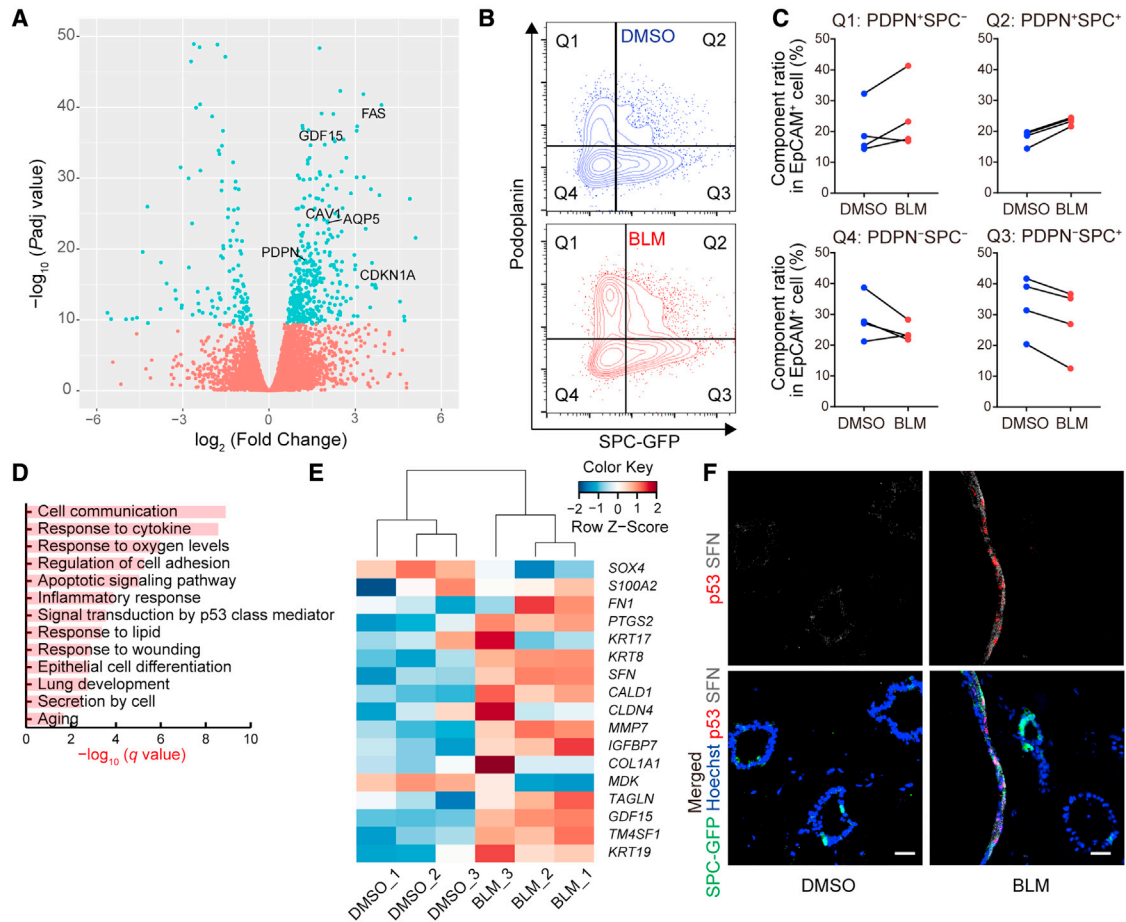

**Figure 3. BLM-treated epithelial cells involve AT2-AT1 intermediate-state cells in FD-AOs**

(A) Volcano plot obtained from the DESeq2 analysis of SPC-GFP<sup>+</sup> cell with or without BLM treatment (n = 3 independent experiments). SPC-GFP<sup>+</sup> cells were separated from FD-AOs.

(B and C) FCM analysis of PDPN and SPC-GFP in EpCAM<sup>+</sup> gated cells (n = 4 independent experiments).

(D) GO analysis using the top 500 DEGs upon BLM treatment in SPC<sup>+</sup> cells.

(E) Heatmap indicating Z scores of the PATS markers. The log<sub>2</sub> (TPM values) of SPC<sup>+</sup> cells were used to calculate Z scores (n = 3 independent experiments).

(F) IFA of FD-AOs. Green, GFP-SPC; red, p53; gray, SFN; blue, nuclei (Hoechst). Scale bars, 25 μm.

enriched and those associated with the GO term “Aging” were detected (Figure 3D). In addition, “Aging” was also listed when we performed GO enrichment analysis using IPF AT2 cell-related genes recapitulated in BLM-treated SPC<sup>+</sup> cells (Figures S4A and S4B) (Reyffman et al., 2019; Rouillard et al., 2016). It has been reported that cellular senescence of alveolar epithelial cells occurs in the IPF lung and that it could be a trigger for pulmonary fibrosis (Reyffman et al., 2019; Yao et al., 2021). Therefore, we evaluated whether the present BLM-induced model could be used as a senescence model of AT2 cells. GSEA showed that “cellular senescence” was significantly upregulated (nominal p value = 0.0013, FDR q value = 0.011) (Figure 4A). It has been reported that senescent cells secrete various pro-

inflammatory cytokines, growth factors, and proteases that enhance cellular senescence in an autocrine and paracrine manner. These features of senescent cells are called senescence-associated secretory phenotype (SASP) (Coppé et al., 2010). Expression of major SASP factors *IL6*, *CXCL8*, and *SERPINE1* was increased in BLM-treated FD-AOs (Figure 4B). To evaluate the extent of senescence in each population, we isolated epithelial cells and fibroblasts from FD-AOs and measured the activity of senescence-associated β-galactosidase (SA-β-gal). SA-β-gal activity increased in both populations upon BLM treatment, but the increase was greater in epithelial cells than in fibroblasts (Figure 4C). Consistent with the SA-β-gal activity, IFA showed an increase in the number of p21<sup>+</sup> epithelial cells (Figure 4D).

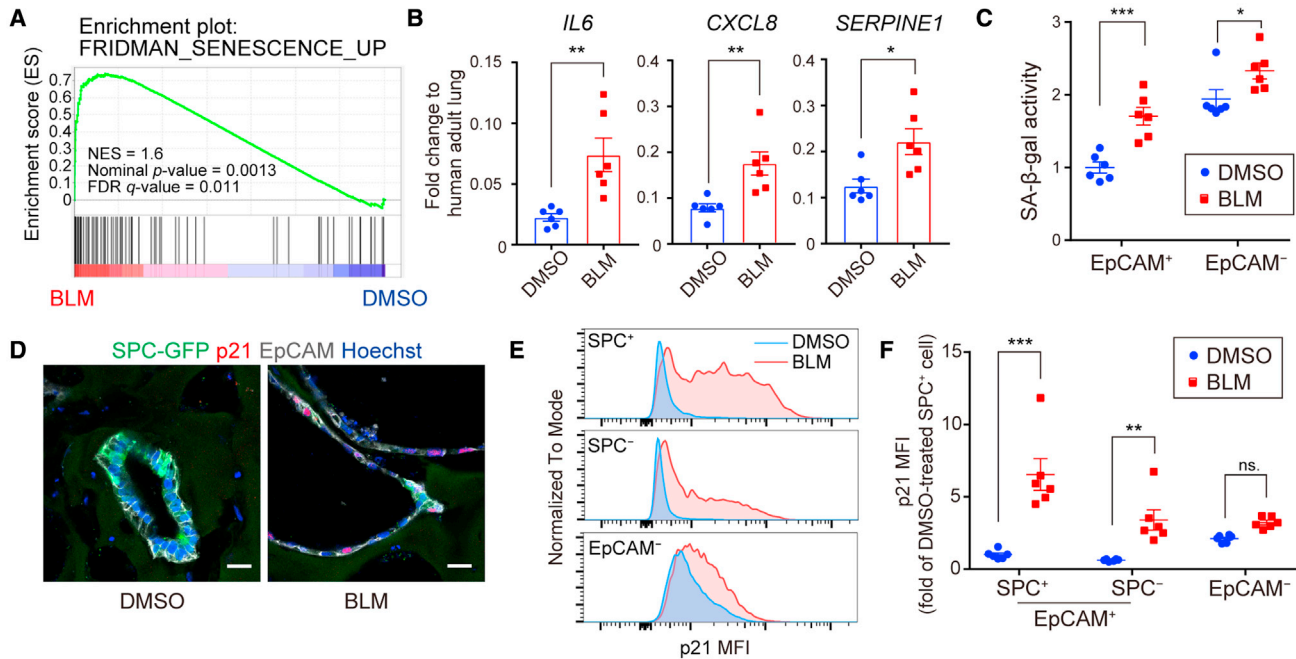

**Figure 4. BLM induces cellular senescence in AT2 cells**

(A) GSEA analysis of “Fridman\_senescence\_up.” Data from SPC-GFP<sup>+</sup> cells were used and ranked based on the p value of DESeq2. (B) Expression of the SASP factors in FD-AOs evaluated by qRT-PCR. Gene expression in the normalizer (adult lung RNA control) was set at 1. Data are presented as mean ± SEM (n = 6 independent experiments). Unpaired two-tailed Student’s t test: \*p < 0.05, \*\*p < 0.01. (C) SA-β-gal activity in MACS-separated EpCAM<sup>+</sup> and EpCAM<sup>-</sup> cells. Each value was corrected based on protein concentration and expressed as a value relative to DMSO-treated EpCAM<sup>+</sup> cells. Data are presented as mean ± SEM (n = 6 independent experiments). Two-way ANOVA with Sidak’s multiple comparisons test: \*p < 0.05, \*\*\*p < 0.001; ns, not significant. (D) IFA of FD-AOs. Green, SPC-GFP; red, p21; gray, EpCAM; blue, nuclei (Hoechst). Scale bars, 20 μm. (E and F) p21 expression evaluated by FCM. Data are presented as mean ± SEM (n = 6 independent experiments). Two-way ANOVA with Sidak’s multiple comparisons test: \*\*p < 0.01, \*\*\*p < 0.001; ns, not significant.

Quantitative analysis using FCM showed that p21 was up-regulated upon BLM treatment in epithelial cells, especially in AT2 cells (Figures 4E and 4F). Furthermore, BLM treatment also induced cellular senescence in FF-AOs (Figure S3I). These results suggest that BLM directly induces cellular senescence in alveolar epithelial cells and that AT2 cells could be more vulnerable to DNA damage.

#### Inhibition of ALK5 ameliorates BLM-induced abnormality in epithelial cells in FD-AOs

In a search for key signaling pathways that could be therapeutically used to ameliorate SASP and PATS in BLM-treated FD-AOs, compounds that have been reported to affect cellular senescence, inflammation, or the program of AT2-to-AT1 cell differentiation were selected for screening (Table S3) (Das et al., 2007; Kanagaki et al., 2021a; Paez-Ribes et al., 2019; Yamamoto et al., 2017). A p38 inhibitor, SB203580, and an ALK5 inhibitor, SB525334, were found to suppress the markers of SASP (*IL6*, *CXCL8*, *SERPINE1*) and PATS (*SFN*, *GDF15*, *MMP7*) in BLM-treated FD-AOs (Figures 5A and 5B). Since ATP-

competitive kinase inhibitors have been reported to exhibit a number of off-target effects (Knight and Shokat, 2005), a validation study was conducted using compounds with the same target but different structures (Figures S5A and S5B). All ALK5 inhibitors, but not all p38 inhibitors, suppressed the markers of SASP and PATS in BLM-treated FD-AOs (Figure S5C). Therefore, we focused on ALK5 inhibitors for further studies. Since these studies assessed the whole organoids, we separated epithelial cells and fibroblasts to investigate the efficacy of the ALK5 inhibitors in each population. SB525334 suppressed the expression of SASP markers in both populations (Figure 5C). The inhibitory effect was also observed for the PATS marker expression in epithelial cells of FD-AOs (Figure 5D) and in the MMP7 concentration in the culture supernatant (Table S4).

#### Inhibition of ALK5 promotes AT1 cell differentiation in BLM-treated FD-AOs

We evaluated the effect of ALK5 inhibition on differentiation states of alveolar epithelial cells in BLM-treated FD-AOs. The proportion of EpCAM<sup>+</sup> cells and the diameter of

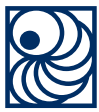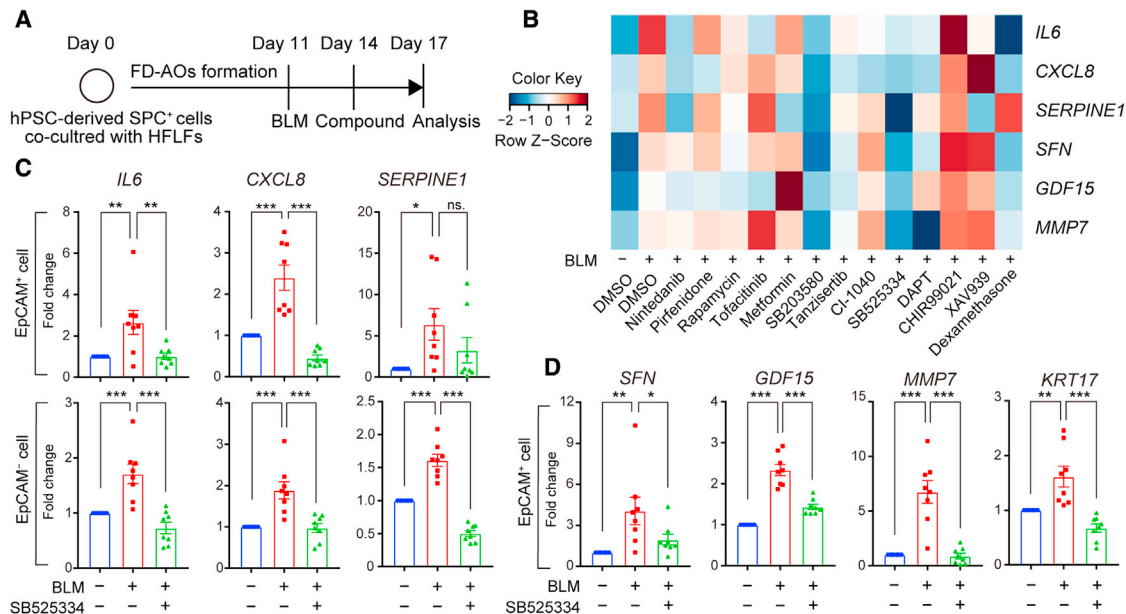

**Figure 5. Compound screening identifies SB525334, an ALK5 inhibitor, which ameliorates BLM-induced abnormality of epithelial cells in FD-AOs**

(A) Schematic overview of compound treatment.

(B) Heatmap indicating Z scores of the SASP factors (*IL6*, *CXCL8*, *SERPINE1*) and PATS markers (*SFN*, *GDF15*, *MMP7*). Raw data were measured by qRT-PCR in whole organoids. The Z scores were calculated using the averaged value of fold change relative to the BLM-treated sample in each experiment ( $n \geq 3$  independent experiments).

(C) Expression of the SASP factors in EpCAM<sup>+</sup> and EpCAM<sup>-</sup> cells separated from FD-AOs measured by qRT-PCR and normalized to each control.

(D) Expression of the PATS markers in EpCAM<sup>+</sup> cells separated from FD-AOs.

Data are presented as mean  $\pm$  SEM ( $n = 8$  independent experiments). One-way ANOVA with Dunnett's multiple comparisons test: \* $p < 0.05$ , \*\* $p < 0.01$ , \*\*\* $p < 0.001$ ; ns, not significant.

alveolar spheroids in BLM-treated FD-AOs were not changed by ALK5 inhibition (Figures 6A–6C), but the thickness of alveolar spheroids was decreased (Figure 6D). ALK5 inhibition upregulated AT1 cell marker expression other than that for *PDPN* in BLM-treated FD-AOs while it did not seem to downregulate AT2 cell marker expression in EpCAM<sup>+</sup> cells (Figure 6E). Indeed, IFA showed that the AGER<sup>+</sup> area of the EpCAM<sup>+</sup> area was increased by BLM treatment and further enhanced by ALK5 inhibition (Figures 6F and 6G). These results suggest that ALK5 inhibitors ameliorate the expression of both SASP and PATS markers while maintaining or protecting the differentiation states of alveolar epithelial cells.

### Fibrogenic changes in BLM-treated FD-AOs are mediated by TGF $\beta$ 1 signaling from epithelial cells

Since ALK5 inhibitors suppress transforming growth factor  $\beta$  (TGF $\beta$ ) signaling, we asked whether TGF $\beta$  signaling was activated in BLM-treated FD-AOs. We reanalyzed the RNA-seq data and observed that *TGF $\beta$ 1* expression was significantly upregulated in SPC<sup>+</sup> cells upon BLM treat-

ment, while there was no significant change in the expression of *TGF $\beta$ 1* in fibroblasts derived from FD-AOs or HFLF-only culture (Figure 7A). In contrast, *TGF $\beta$ 1* was significantly upregulated only in fibroblasts isolated from BLM-treated FD-AOs.

TGF $\beta$ 1 is produced and secreted in an inactive latent form that cannot bind to its receptors and must be activated by certain factors (Munger and Sheppard, 2011). Integrin  $\alpha$ V $\beta$ 6 is a TGF $\beta$ -activating integrin whose expression is upregulated in injured epithelial cells, and BLM-induced fibrosis is suppressed in integrin  $\alpha$ V $\beta$ 6-deficient mice (Munger et al., 1999). Integrin  $\alpha$ V $\beta$ 6 has been reported to be upregulated in IPF lungs (Horan et al., 2008), and the IPF cell atlas (Neumark et al., 2020) shows that integrin  $\alpha$ V $\beta$ 6 has particularly high expression in the abnormal epithelial cells called “aberrant basaloid cells” found in IPF lungs (Figure S6A). In our model, integrin  $\alpha$ V $\beta$ 6 was upregulated in epithelial cells upon BLM treatment (Figure 7B) and highly expressed in SPC<sup>+</sup>PDPN<sup>+</sup> cells (Figure S6B). The integrin  $\alpha$ V $\beta$ 6 protein is composed of  $\alpha$ V and  $\beta$ 6 subunits. Its expression is regulated by the *ITGB6* gene, and was



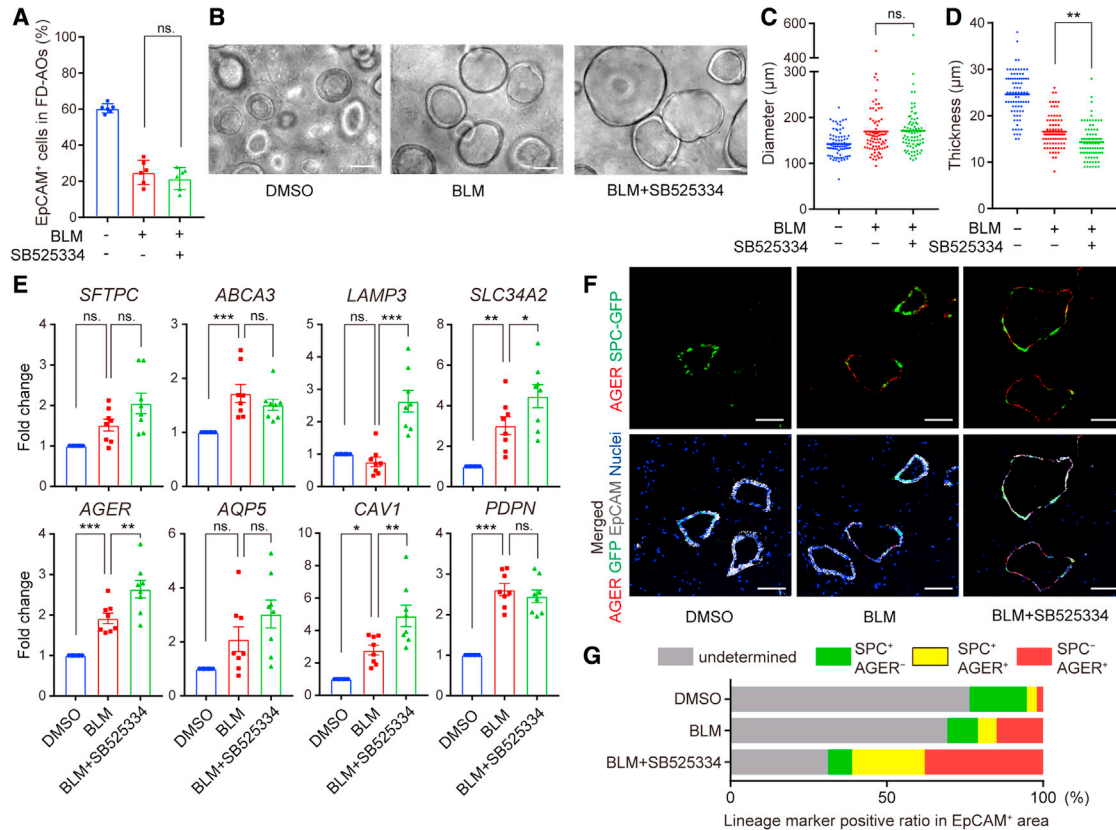

### Figure 6. Inhibition of ALK5 promotes AT1 cell differentiation in BLM-treated FD-AOs

(A) Analyses of cell component ratio in FD-AOs using FCM. Data are presented as mean ± SEM (n = 6 independent experiments).

(B) Live-cell imaging of epithelial cells in FD-AOs. Scale bars, 100 μm.

(C and D) Quantification of diameter and thickness of alveolar spheroids. Data are presented as mean ± SEM (n = 80 spheroids from 4 independent experiments).

(E) Expression of AT2 cell markers (*SFTPC*, *ABCA3*, *SLC34A2*, *LAMP3*) and AT1 cell markers (*AQP5*, *AGER*, *CAV1*, *PDPN*) in EpCAM<sup>+</sup> cells measured by qRT-PCR. Data are presented as mean ± SEM (n = 8 independent experiments).

(F) IFA of FD-AOs. Green, SPC-GFP; red, AGER; gray, EpCAM; blue, nuclei (Hoechst). Scale bars, 100 μm.

(G) Ratio of lineage marker-positive area to EpCAM<sup>+</sup> area. Data are presented as mean (n = 3 independent experiments).

One-way ANOVA with Dunnett's multiple comparisons test: \*p < 0.05, \*\*p < 0.01, \*\*\*p < 0.001; ns, not significant.

shown to be suppressed by SB525334 in this model (Figures S6C and S6D). Furthermore, GSK3008348, an integrin αVβ6 antagonist, partially suppressed the expression of SASP and PATS marker genes in BLM-treated FD-AOs (Figures S6E and S6F). BLM treatment also upregulated the mRNA expression of *TGFβ1* and *ITGB6* in FF-AOs (Figure S7). Although active TGFβ1 could not be detected in the culture supernatant of BLM-treated FD-AOs (Table S4), these results suggest that alveolar epithelial cells could be a source of TGFβ and play a role as local activator of TGFβ (Wu et al., 2020).

GSEA analysis showed that fibroblasts received the TGFβ1 signal in BLM-treated FD-AOs (Figure 7C). Functionally, BLM-induced contraction of FD-AOs was ameliorated by SB525334 and GSK3008348 (Figures S6G and

S6H). Furthermore, addition of active TGFβ1 recapitulated the global contraction of the matrices in FD-AOs or HFLF-only culture (Figures 7D and 7E). In transcriptome analysis, contractile genes *ACTA2*, *CNN1*, *MYH11*, and *TAGLN* (Popova et al., 2010) were downregulated by SB525334 in fibroblasts separated from BLM-treated FD-AOs (Figure 7F). Finally, proteomic analysis of FD-AOs, including the cultivation matrix, was performed to evaluate the accumulation of extracellular matrix, which is strong evidence of fibrosis (Table S5). Pathway enrichment analysis using Reactome software (Jassal et al., 2020) showed that proteins annotated to “Extracellular matrix organization” and “Collagen formation” were enriched in proteins upregulated upon BLM treatment (Figure 7G). We then evaluated the efficacy of SB525334 on all 30 proteins annotated to “Extracellular

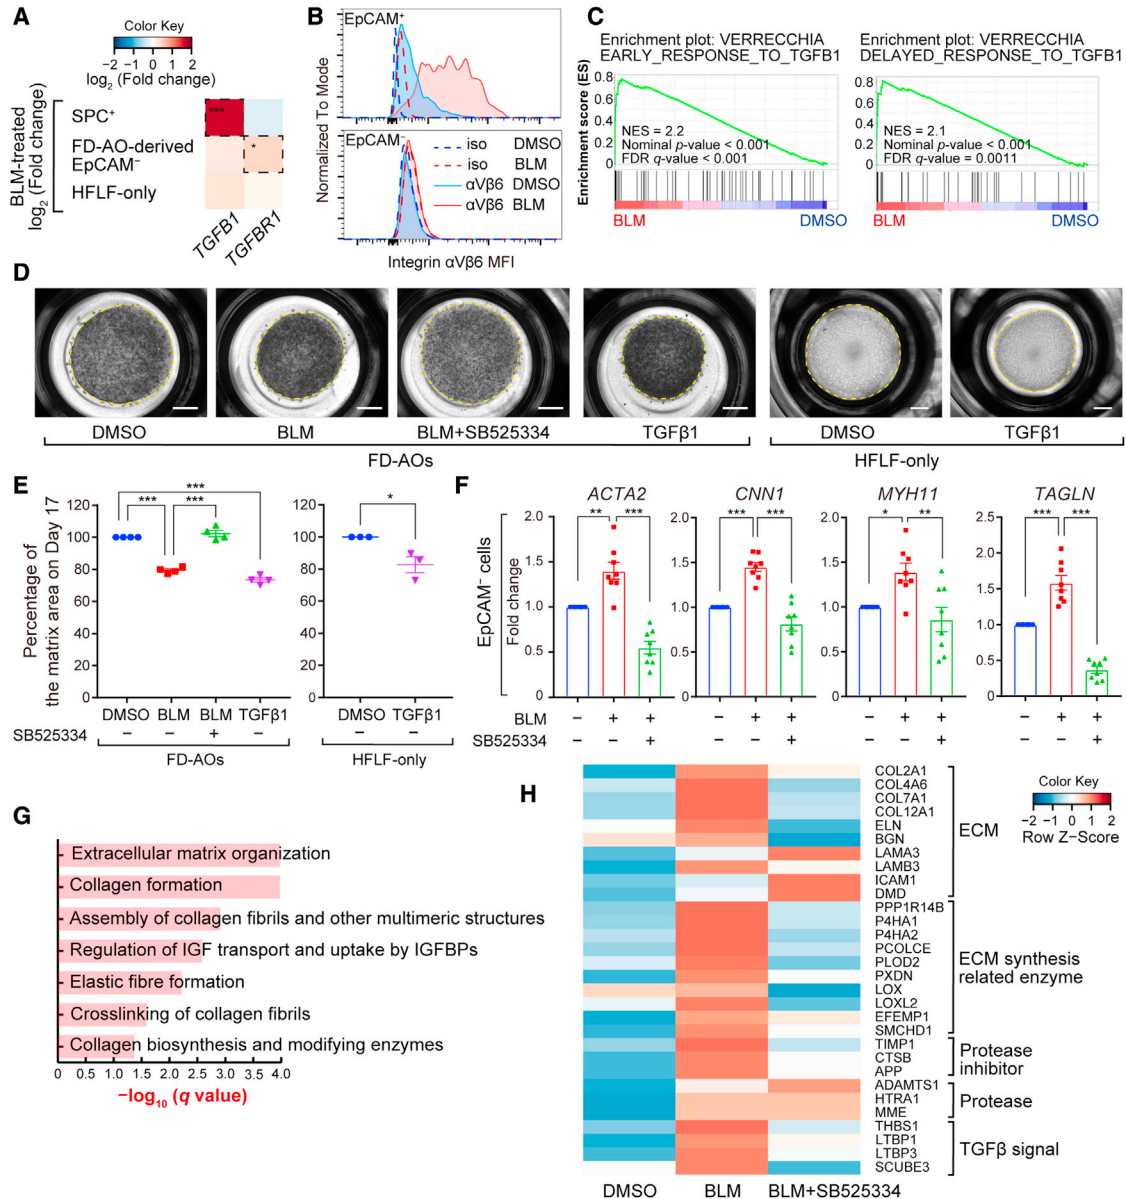

**Figure 7. Fibrogenic changes are mediated by alveolar epithelial cell-derived TGFβ1 signaling in BLM-treated FD-AOs**

(A) Heatmap indicating  $\log_2(\text{fold change})$  of *TGFβ1* and *TGFβR1* in each population calculated from RNA-seq counts using DESeq2. DESeq2 adjusted: \* $p < 0.05$ , \*\*\* $p < 0.001$ .

(B) Cell-surface levels of integrin  $\alpha\text{V}\beta6$  in  $\text{EpCAM}^+$  and  $\text{EpCAM}^-$  cell populations were measured by FCM.

(C) GSEA analysis of “Verrecchia\_early/delayed response to TGFβ1.” Data from  $\text{EpCAM}^-$  cells separated from FD-AOs were used and ranked based on the p value of DESeq2.

(D) Whole-well imaging of cultivation matrices at day 17. Each well was treated with BLM from day 11 to day 14 and with 1  $\mu\text{M}$  SB525334 or 3 ng/mL active TGFβ1 from day 14 to day 17. Scale bars, 2 mm.

(E) Quantification of matrix area. Data are presented as mean  $\pm$  SEM ( $n = 3$  or 4 independent experiments).

(F) Expression of contractile genes in fibroblasts separated from FD-AOs measured by qRT-PCR and normalized to each control. Data are presented as mean  $\pm$  SEM ( $n = 8$  independent experiments).

(G) Pathway enrichment analysis using the Reactome software of 427 proteins upregulated by BLM. Proteomic analysis was performed on whole cultivation matrices including cells, and the threshold for upregulation was set to  $\log_2(\text{fold change}) > 0.4$ .

(H) Efficacy of SB525334 on all 30 proteins annotated with “Extracellular matrix organization” that were upregulated by BLM. Heatmap indicating Z score of each protein. The  $\log_2(\text{fold change})$  was used to calculate the Z scores.

One-way ANOVA with Tukey’s multiple comparisons test: \* $p < 0.05$ , \*\* $p < 0.01$ , \*\*\* $p < 0.001$ ; ns, not significant.

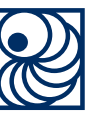

matrix organization” that were upregulated upon BLM treatment. These results showed that SB525334 did not downregulate the expression of adhesion factors and proteases but did downregulate the expression of collagen and its synthases as well as proteins related to TGF $\beta$  signaling (Figure 7H).

## DISCUSSION

Epithelial-mesenchymal interactions have long been reported to play important roles in various disorders that depend on fibrogenesis, including IPF (Katzen and Beers, 2020), and in site-specific tissue regeneration (Yamaguchi et al., 2005). However, there are few practical human *in vitro* models of pulmonary fibrosis because of the difficulty of culturing alveolar epithelial cells. Therefore, little progress has been made toward the study of human pulmonary fibrosis or the identification of therapeutic agents for it that target epithelial cells (Spagnolo et al., 2020). Recently, it has been reported that AT2 cells isolated from human tissues could be cultured over a long term while maintaining their functions (Katsura et al., 2020; Youk et al., 2020). These cells are expected to be a source for complex lung disease models such as IPF that presumably require co-culture experiments. However, primary cells could have a large lot-to-lot variability, which poses a challenge in utilizing them in continuous screening over a long period of time. Furthermore, because human primary cells have been difficult to modify genetically via cloning, hPSC-derived cells have been advantageous in analyzing detailed molecular mechanisms of differentiation and disease models.

In this study, we demonstrated that hPSC-derived FD-AOs could be beneficial for screening various chemicals to find potential therapeutic targets for pulmonary fibrosis, targeting alveolar epithelial cells in particular. BLM, a DNA-damaging agent, induced cellular senescence in epithelial cells, especially in AT2 cells in FD-AOs, which is consistent with the presence of cellular senescence in AT2 cells in the IPF lung (Reyfman et al., 2019). In addition, the homeostasis of lipid metabolism is reported to be altered in aged lungs (Angelidis et al., 2019). We speculate that phospholipid accumulation of AT2 cells could be an indicator of aging or senescence, although further validation studies are needed. Several groups have reported the presence of transitionally differentiated alveolar epithelial cells as an intermediate cellular state that is associated with the conversion from AT2 cells to AT1 cells in regenerating lungs (Choi et al., 2020; Kobayashi et al., 2020; Strunz et al., 2020). An increased number of these AT2-AT1 intermediate-like cells, with p53-mediated cellular senescence as a common phenotype, could be present in the IPF lung. We showed

that our BLM-treated FD-AOs could be a novel tool to study the abnormally differentiated state of these alveolar epithelial cells in IPF. While screening for signaling inhibitors, we found that ALK5 inhibitors ameliorated phenotypes of fibrogenesis, such as inflammatory responses and AT2-AT1 intermediate-like states that are associated with epithelial senescence, inducing the expression of AT1 cell markers in FD-AOs. This is consistent with the recent finding that inhibition of TGF $\beta$  during late stages of the differentiation of AT2 to AT1 cells leads to an increase in AT1 cell markers in a two-dimensional culture model of rat AT2 cells (Rieмонdy et al., 2019). Furthermore, the effects of TGF $\beta$  in the present study may be explained by the presence of a positive feedback loop in TGF $\beta$ -secreting senescent AT2 cells, which reinforces cellular senescence in an autocrine and paracrine manner (Hubackova et al., 2012). The secreted TGF $\beta$  is activated by integrin  $\alpha$ V $\beta$ 6 of alveolar epithelial cells, especially in cells present in the AT2-AT1 intermediate states, which in turn strengthens the signaling to fibroblasts.

There are three limitations to our model to study epithelial-mesenchymal interactions related to the pathogenesis of IPF. The first is that the chemically induced model can act on both epithelial cells and fibroblasts in FD-AOs. Although BLM has a stronger effect on epithelial cells than on fibroblasts in FD-AOs, it is unclear whether alveolar epithelial cell-specific damage could dominantly activate fibroblasts in FD-AOs. Genetically modified or patient-specific hPSC models that can produce damage specifically to epithelial cells are required for future studies. Second, our FD-AOs contain undetermined epithelial lineage cells (Kanagaki et al., 2021a), and the alveolar epithelial cells are relatively immature compared with adult alveolar epithelial cells. Those undetermined epithelial cells need to be analyzed in detail or be reduced by modification of culture conditions in future studies. The increase in PDPN<sup>+</sup>SPC<sup>+</sup> cells in BLM-treated FD-AOs might reflect the immaturity of human PSC-derived AT2 cells in the present study, as we previously reported that the transcriptome of FD-AO-derived AT2 cells is more similar to that of a majority of *Sftpc*<sup>+</sup> cells isolated from embryonic-day-18.5 mice than to that of cells from adult mice (Yamamoto et al., 2017). Therefore, further evaluation is needed to determine whether the increase in PDPN<sup>+</sup>SPC<sup>+</sup> cells in BLM-treated FD-AOs is indicative of the increase of transdifferentiating cells upon injury (Paris et al., 2020) or of bipotent cells present during development (Desai et al., 2014). Third, the pathogenesis of BLM-treated FD-AOs was relatively weak compared with that of cells in *in vivo* mouse models. We could not fully recapitulate PATS marker gene expression (such as *SOX4* and *CLDN4*) in BLM-treated FD-AOs. Excessive mechanical stress (Wu et al., 2020) and sustained inflammatory response to inflammatory cytokines from



immune cells (Choi et al., 2020) have been reported to impair the differentiation program of AT2 cells, which could contribute to the pathogenesis of pulmonary fibrosis. Therefore, a device that mimics lung stretching or interaction with immune cells may adequately address this problem.

In conclusion, we developed an *in vitro* model of pulmonary fibrosis using hPSC-derived alveolar organoids that can be beneficial for screening potential therapeutic agents for IPF. In this model, we observed epithelial cell-dependent BLM-induced cellular senescence in AT2 cells and abnormally differentiated intermediate-state AT2-AT1 cells, along with fibroblast activation, organoid contraction, and extracellular matrix accumulation, similar to the fibrogenesis of IPF. We believe that an *in vitro* recapitulation of pulmonary fibrosis may accelerate not only the understanding the IPF pathogenesis but also drug discovery to help in the treatment of the as yet incurable IPF.

## EXPERIMENTAL PROCEDURES

### Culture of hPSCs and human lung fibroblasts

All cells in the present study were cultured under 5% CO<sub>2</sub> at 37°C. The hPSCs were cultured as previously described (Yamamoto et al., 2017). In brief, SPC-GFP reporter hPSCs (Gotoh et al., 2014), 585A1 (RIKEN BRC #HPS0354), and 648A1 (RIKEN BRC #HPS0360) were maintained in Essential 8 medium (Thermo Fisher Scientific) or mTeSR Plus (STEMCELL Technologies) (Okita et al., 2013). HFLFs (17.5 weeks of gestation; DV Biologics #PP002-F-1349), MRC-5 (14 weeks of gestation; ATCC #CCL-171), and TIG-1-20 (20 weeks of gestation; JCRB Cell Bank #JCRB0501) were cultured in Dulbecco's modified Eagle's medium (Nacalai Tesque) supplemented with 10% fetal bovine serum (FBS; Sigma-Aldrich #F7524) and 50 U/mL penicillin-streptomycin (P-S; Thermo Fisher Scientific). LL47 (16 years of age; ATCC #CCL-135) were cultured in Ham's F-12K (Fujifilm Wako) supplemented with 15% FBS and 50 U/mL P-S. SPC-GFP reporter hPSCs and HFLFs were used for all experiments except those described in Figure S1. The use of 585A1 and 648A1 hPSCs was approved by the Ethics Committee of Kyoto University Graduate School and Faculty of Medicine. The use of other cells was exempted from ethical approval.

### Maintenance of hPSC-derived AT2 cells in FD-AOs

hPSC-derived SPC-GFP<sup>+</sup> cells were isolated from FD-AOs using fluorescence-activated cell sorting (FACS) with APC-conjugated mouse anti-human EpCAM antibody (1:100, Miltenyi Biotec #130-113-260) as described previously (Yamamoto et al., 2017). FACS-sorted SPC-GFP<sup>+</sup> cells ( $1 \times 10^4$ ) were mixed with  $5 \times 10^5$  pre-cultured lung fibroblasts in 200  $\mu$ L of 50% growth factor reduced Matrigel (Corning) diluted with DCIK medium (Yamamoto et al., 2017) supplemented with 10  $\mu$ M Y-27632 (LC Laboratories). Approximately 200  $\mu$ L of the mixed cells was placed on a 12-well cell culture insert (Corning), and 1 mL of DCIK medium containing 10  $\mu$ M Y-27632 was added to the lower chamber. In the 24-well format, half the fluid volume was used. FD-AOs were cultured

for 14 days, and the medium in the lower chamber was replaced with DCIK medium every 2–3 days. SPC-GFP<sup>+</sup> cells were isolated every 14 days and repeatedly cultured in FD-AOs to maintain the SPC-GFP<sup>+</sup> cells. The FD-AOs were used with FACS-sorted SPC-GFP<sup>+</sup> cells passaged 1–8 times. In this study, a BD FACSAria III Cell Sorter (Becton Dickinson) was used for FCM and FACS.

### BLM and compound treatment in FD-AOs

SPC-GFP<sup>+</sup> cell-derived FD-AOs were treated with 3  $\mu$ g/mL BLM (Nippon Kayaku) in the lower chamber medium from day 11 to day 14. BLM was washed out on day 14 with PBS (Nacalai Tesque), and the FD-AOs were cultured in dexamethasone-free DCIK medium from day 14 to day 17. Each compound used for screening (Table S3) or with 3 ng/mL active TGF $\beta$ 1 (Bio-Techne, #7754-BH) was supplemented in the medium from day 14 to day 17.

### Statistical analysis

Data are presented as mean  $\pm$  standard error of the mean (SEM). The number of biological replicates and statistical tests are described in each figure legend. All statistical tests were performed using Prism7 software (GraphPad). *p* values of  $< 0.05$  were considered statistically significant.

### Data and code availability

The accession numbers for the sequencing raw data reported in the present study are GEO: GSE172121 and GSE172122.

## SUPPLEMENTAL INFORMATION

Supplemental information can be found online at <https://doi.org/10.1016/j.stemcr.2021.10.015>.

## AUTHOR CONTRIBUTIONS

Conceptualization, T.S., S.K., R.M., K.T., and S.G.; methodology, T.S. and S.K.; software, T.S. and K. Moriguchi; validation, A.M.; formal analysis, T.S. and S.G.; investigation, T.S., K. Moriguchi, A.M., and S.G.; resources, K.N., M.T., and S.G.; writing, T.S. and S.G.; supervision, T.H., K. Murakami, and M.H.

## CONFLICTS OF INTERESTS

T.S., S.K., K. Moriguchi, A.M., K.N., and K. Murakami are employees, received research funding, and are shareholders of Kyorin Pharmaceutical Co., Ltd. M.H. and S.G. are founders and shareholders of HiLung Inc. M.H. received research funding from Kyorin Pharmaceutical. S.G. is listed as one of the inventors of Kyoto University's patents related to the method of generating alveolar organoids. The other authors declare no competing interests.

## ACKNOWLEDGMENTS

We thank Y. Yamamoto, Y. Korogi, N. Sone, S. Ikeo, K. Igura, S. Ito, J. Kanamune, M. Kishihata, H. Yamaki, and Y. Ohnishi for experimental assistance and helpful discussion; all members of the Center for Anatomical, Pathological and Forensic Medical Research, Kyoto University for preparing paraffin sections and electron microscopy; and all members of the Medical Research Support Center, Kyoto University for adjustment of laboratory equipment.



This study was funded by Kyorin Pharmaceutical Co., Ltd. and by AMED (JP17bm0804007 to T.H. and JP19bm0704037 to S.G.).

Received: May 2, 2021  
Revised: October 21, 2021  
Accepted: October 22, 2021  
Published: November 18, 2021

## REFERENCES

- Agarwal, A., Coleno, M.L., Wallace, V.P., Wu, W.Y., Sun, C.H., Tromberg, B.J., and George, S.C. (2001). Two-photon laser scanning microscopy of epithelial cell-modulated collagen density in engineered human lung tissue. *Tissue Eng.* *7*, 191–202. <https://doi.org/10.1089/107632701300062813>.
- Angelidis, I., Simon, L.M., Fernandez, I.E., Strunz, M., Mayr, C.H., Greiffo, F.R., Tsitsiridis, G., Ansari, M., Graf, E., Strom, T.M., et al. (2019). An atlas of the aging lung mapped by single cell transcriptomics and deep tissue proteomics. *Nat. Commun.* *10*, 963. <https://doi.org/10.1038/s41467-019-08831-9>.
- Barkauskas, C.E., Crouse, M.J., Rackley, C.R., Bowie, E.J., Keene, D.R., Stripp, B.R., Randell, S.H., Noble, P.W., and Hogan, B.L. (2013). Type 2 alveolar cells are stem cells in adult lung. *J. Clin. Invest.* *123*, 3025–3036. <https://doi.org/10.1172/jci68782>.
- Basil, M.C., Katzen, J., Engler, A.E., Guo, M., Herriges, M.J., Kathiriyai, J.J., Windmueller, R., Ysasi, A.B., Zacharias, W.J., Chapman, H.A., et al. (2020). The cellular and physiological basis for lung repair and regeneration: past, present, and future. *Cell Stem Cell* *26*, 482–502. <https://doi.org/10.1016/j.stem.2020.03.009>.
- Cazzalini, O., Scovassi, A.I., Savio, M., Stivala, L.A., and Prosperi, E. (2010). Multiple roles of the cell cycle inhibitor p21(CDKN1A) in the DNA damage response. *Mutat. Res.* *704*, 12–20. <https://doi.org/10.1016/j.mrrev.2010.01.009>.
- Chen, J.K., Taipale, J., Cooper, M.K., and Beachy, P.A. (2002). Inhibition of Hedgehog signaling by direct binding of cyclopamine to Smoothened. *Genes Dev.* *16*, 2743–2748. <https://doi.org/10.1101/gad.1025302>.
- Choi, J., Park, J.E., Tsagkogeorga, G., Yanagita, M., Koo, B.K., Han, N., and Lee, J.H. (2020). Inflammatory signals induce AT2 cell-derived damage-associated transient progenitors that mediate alveolar regeneration. *Cell Stem Cell* *27*, 366–382.e7. <https://doi.org/10.1016/j.stem.2020.06.020>.
- Coppé, J.P., Desprez, P.Y., Krtolica, A., and Campisi, J. (2010). The senescence-associated secretory phenotype: the dark side of tumor suppression. *Annu. Rev. Pathol.* *5*, 99–118. <https://doi.org/10.1146/annurev-pathol-121808-102144>.
- Das, M., Jiang, F., Sluss, H.K., Zhang, C., Shokat, K.M., Flavell, R.A., and Davis, R.J. (2007). Suppression of p53-dependent senescence by the JNK signal transduction pathway. *Proc. Natl. Acad. Sci. U S A* *104*, 15759–15764. <https://doi.org/10.1073/pnas.0707782104>.
- Desai, T.J., Brownfield, D.G., and Krasnow, M.A. (2014). Alveolar progenitor and stem cells in lung development, renewal and cancer. *Nature* *507*, 190–194. <https://doi.org/10.1038/nature12930>.
- Gotoh, S., Ito, I., Nagasaki, T., Yamamoto, Y., Konishi, S., Korogi, Y., Matsumoto, H., Muro, S., Hirai, T., Funato, M., et al. (2014). Generation of alveolar epithelial spheroids via isolated progenitor cells from human pluripotent stem cells. *Stem Cell Reports* *3*, 394–403. <https://doi.org/10.1016/j.stemcr.2014.07.005>.
- Horan, G.S., Wood, S., Ona, V., Li, D.J., Lukashev, M.E., Weinreb, P.H., Simon, K.J., Hahm, K., Allaire, N.E., Rinaldi, N.J., et al. (2008). Partial inhibition of integrin alpha(v)beta6 prevents pulmonary fibrosis without exacerbating inflammation. *Am. J. Respir. Crit. Care Med.* *177*, 56–65. <https://doi.org/10.1164/rccm.200706-805OC>.
- Hubackova, S., Krejciikova, K., Bartek, J., and Hodny, Z. (2012). IL1- and TGFβ-Nox4 signaling, oxidative stress and DNA damage response are shared features of replicative, oncogene-induced, and drug-induced paracrine 'bystander senescence'. *Aging* *4*, 932–951. <https://doi.org/10.18632/aging.100520>.
- Jassal, B., Matthews, L., Viteri, G., Gong, C., Lorente, P., Fabregat, A., Sidiropoulos, K., Cook, J., Gillespie, M., Haw, R., et al. (2020). The reactome pathway knowledgebase. *Nucleic Acids Res.* *48*, D498–D503. <https://doi.org/10.1093/nar/gkz1031>.
- Kanagaki, S., Ikeo, S., Suezawa, T., Yamamoto, Y., Seki, M., Hirai, T., Hagiwara, M., Suzuki, Y., and Gotoh, S. (2021a). Directed induction of alveolar type I cells derived from pluripotent stem cells via Wnt signaling inhibition. *Stem Cells* *39*, 156–169. <https://doi.org/10.1002/stem.3302>.
- Kanagaki, S., Suezawa, T., Moriguchi, K., Nakao, K., Toyomoto, M., Yamamoto, Y., Murakami, K., Hagiwara, M., and Gotoh, S. (2021b). Hydroxypropyl cyclodextrin improves amiodarone-induced aberrant lipid homeostasis of alveolar cells. *Am. J. Respir. Cell Mol. Biol.* *64*, 504–514. <https://doi.org/10.1165/rcmb.2020-0119OC>.
- Katsura, H., Sontake, V., Tata, A., Kobayashi, Y., Edwards, C.E., Heaton, B.E., Konkimalla, A., Asakura, T., Mikami, Y., Fritch, E.J., et al. (2020). Human lung stem cell-based alveolospheres provide insights into SARS-CoV-2-mediated interferon responses and pneumocyte dysfunction. *Cell Stem Cell* *27*, 890–904.e8. <https://doi.org/10.1016/j.stem.2020.10.005>.
- Katzen, J., and Beers, M.F. (2020). Contributions of alveolar epithelial cell quality control to pulmonary fibrosis. *J. Clin. Invest.* *130*, 5088–5099. <https://doi.org/10.1172/jci139519>.
- Knight, Z.A., and Shokat, K.M. (2005). Features of selective kinase inhibitors. *Chem. Biol.* *12*, 621–637. <https://doi.org/10.1016/j.chembiol.2005.04.011>.
- Kobayashi, Y., Tata, A., Konkimalla, A., Katsura, H., Lee, R.F., Ou, J., Banovich, N.E., Kropski, J.A., and Tata, P.R. (2020). Persistence of a regeneration-associated, transitional alveolar epithelial cell state in pulmonary fibrosis. *Nat. Cell Biol.* *22*, 934–946. <https://doi.org/10.1038/s41556-020-0542-8>.
- Korogi, Y., Gotoh, S., Ikeo, S., Yamamoto, Y., Sone, N., Tamai, K., Konishi, S., Nagasaki, T., Matsumoto, H., Ito, I., et al. (2019). In vitro disease modeling of Hermansky-Pudlak syndrome type 2 using human induced pluripotent stem cell-derived alveolar organoids. *Stem Cell Reports* *12*, 431–440. <https://doi.org/10.1016/j.stemcr.2019.01.014>.
- Lederer, D.J., and Martinez, F.J. (2018). Idiopathic pulmonary fibrosis. *N. Engl. J. Med.* *378*, 1811–1823. <https://doi.org/10.1056/NEJMra1705751>.



- Moeller, A., Ask, K., Warburton, D., Gauldie, J., and Kolb, M. (2008). The bleomycin animal model: a useful tool to investigate treatment options for idiopathic pulmonary fibrosis? *Int. J. Biochem. Cell Biol.* *40*, 362–382. <https://doi.org/10.1016/j.biocel.2007.08.011>.
- Montesano, R., and Orci, L. (1988). Transforming growth factor beta stimulates collagen-matrix contraction by fibroblasts: implications for wound healing. *Proc. Natl. Acad. Sci. U S A* *85*, 4894–4897. <https://doi.org/10.1073/pnas.85.13.4894>.
- Munger, J.S., Huang, X., Kawakatsu, H., Griffiths, M.J., Dalton, S.L., Wu, J., Pittet, J.F., Kaminski, N., Garat, C., Matthay, M.A., et al. (1999). The integrin alpha v beta 6 binds and activates latent TGF beta 1: a mechanism for regulating pulmonary inflammation and fibrosis. *Cell* *96*, 319–328. [https://doi.org/10.1016/S0092-8674\(00\)80545-0](https://doi.org/10.1016/S0092-8674(00)80545-0).
- Munger, J.S., and Sheppard, D. (2011). Cross talk among TGF- $\beta$  signaling pathways, integrins, and the extracellular matrix. *Cold Spring Harb. Perspect. Biol.* *3*, a005017. <https://doi.org/10.1101/cshperspect.a005017>.
- Neumark, N., Cosme, C., Jr., Rose, K.A., and Kaminski, N. (2020). The idiopathic pulmonary fibrosis cell atlas. *Am. J. Physiol. Lung Cell Mol. Physiol.* *319*, L887–L893. <https://doi.org/10.1152/ajplung.00451.2020>.
- Okita, K., Yamakawa, T., Matsumura, Y., Sato, Y., Amano, N., Watanabe, A., Goshima, N., and Yamanaka, S. (2013). An efficient nonviral method to generate integration-free human-induced pluripotent stem cells from cord blood and peripheral blood cells. *Stem Cells* *31*, 458–466. <https://doi.org/10.1002/stem.1293>.
- Paez-Ribes, M., González-Gualda, E., Doherty, G.J., and Muñoz-Espín, D. (2019). Targeting senescent cells in translational medicine. *EMBO Mol. Med.* *11*, e10234. <https://doi.org/10.15252/emmm.201810234>.
- Paris, A.J., Hayer, K.E., Oved, J.H., Avgousti, D.C., Toulmin, S.A., Zepp, J.A., Zacharias, W.J., Katzen, J.B., Basil, M.C., Kremp, M.M., et al. (2020). STAT3-BDNF-TrkB signalling promotes alveolar epithelial regeneration after lung injury. *Nat. Cell Biol.* *22*, 1197–1210. <https://doi.org/10.1038/s41556-020-0569-x>.
- Popova, A.P., Bozyk, P.D., Goldsmith, A.M., Linn, M.J., Lei, J., Bentley, J.K., and Hershenson, M.B. (2010). Autocrine production of TGF- $\beta$ 1 promotes myofibroblastic differentiation of neonatal lung mesenchymal stem cells. *Am. J. Physiol. Lung Cell Mol. Physiol.* *298*, L735–L743. <https://doi.org/10.1152/ajplung.00347.2009>.
- Reyfman, P.A., Walter, J.M., Joshi, N., Anekalla, K.R., McQuattie-Pimentel, A.C., Chiu, S., Fernandez, R., Akbarpour, M., Chen, C.I., Ren, Z., et al. (2019). Single-cell transcriptomic analysis of human lung provides insights into the pathobiology of pulmonary fibrosis. *Am. J. Respir. Crit. Care Med.* *199*, 1517–1536. <https://doi.org/10.1164/rccm.201712-2410OC>.
- Riemyndy, K.A., Jansing, N.L., Jiang, P., Redente, E.F., Gillen, A.E., Fu, R., Miller, A.J., Spence, J.R., Gerber, A.N., Hesselberth, J.R., and Zemans, R.L. (2019). Single cell RNA sequencing identifies TGF $\beta$  as a key regenerative cue following LPS-induced lung injury. *JCI Insight* *5*, e123637. <https://doi.org/10.1172/jci.insight.123637>.
- Rouillard, A.D., Gundersen, G.W., Fernandez, N.F., Wang, Z., Monteiro, C.D., McDermott, M.G., and Ma'ayan, A. (2016). The harmonizome: a collection of processed datasets gathered to serve and mine knowledge about genes and proteins. *Database* *2016*, baw100. <https://doi.org/10.1093/database/baw100>.
- Sisson, T.H., Mendez, M., Choi, K., Subbotina, N., Courey, A., Cunningham, A., Dave, A., Engelhardt, J.F., Liu, X., White, E.S., et al. (2010). Targeted injury of type II alveolar epithelial cells induces pulmonary fibrosis. *Am. J. Respir. Crit. Care Med.* *181*, 254–263. <https://doi.org/10.1164/rccm.200810-1615OC>.
- Spagnolo, P., Kropski, J.A., Jones, M.G., Lee, J.S., Rossi, G., Karamitsakos, T., Maher, T.M., Tzouveleakis, A., and Ryerson, C.J. (2020). Idiopathic pulmonary fibrosis: disease mechanisms and drug development. *Pharmacol. Ther.* *222*, 107798. <https://doi.org/10.1016/j.pharmthera.2020.107798>.
- Strunz, M., Simon, L.M., Ansari, M., Kathiriyai, J.J., Angelidis, I., Mayr, C.H., Tsidiridis, G., Lange, M., Mattner, L.F., Yee, M., et al. (2020). Alveolar regeneration through a Krt8<sup>+</sup> transitional stem cell state that persists in human lung fibrosis. *Nat. Commun.* *11*, 3559. <https://doi.org/10.1038/s41467-020-17358-3>.
- Tan, Q., Ma, X.Y., Liu, W., Meridew, J.A., Jones, D.L., Haak, A.J., Sicard, D., Ligresti, G., and Tschumperlin, D.J. (2019). Nascent lung organoids reveal epithelium- and bone morphogenetic protein-mediated suppression of fibroblast activation. *Am. J. Respir. Cell Mol. Biol.* *61*, 607–619. <https://doi.org/10.1165/rcmb.2018-0390OC>.
- Tomasek, J.J., Gabbiani, G., Hinz, B., Chaponnier, C., and Brown, R.A. (2002). Myofibroblasts and mechano-regulation of connective tissue remodelling. *Nat. Rev. Mol. Cell Biol.* *3*, 349–363. <https://doi.org/10.1038/nrm809>.
- Wilkinson, D.C., Alva-Ornelas, J.A., Sucre, J.M., Vijayaraj, P., Durra, A., Richardson, W., Jonas, S.J., Paul, M.K., Karumbayaram, S., Dunn, B., and Gomperts, B.N. (2017). Development of a three-dimensional bioengineering technology to generate lung tissue for personalized disease modeling. *Stem Cells Transl. Med.* *6*, 622–633. <https://doi.org/10.5966/sctm.2016-0192>.
- Wu, H., Yu, Y., Huang, H., Hu, Y., Fu, S., Wang, Z., Shi, M., Zhao, X., Yuan, J., Li, J., et al. (2020). Progressive pulmonary fibrosis is caused by elevated mechanical tension on alveolar stem cells. *Cell* *180*, 107–121.e17. <https://doi.org/10.1016/j.cell.2019.11.027>.
- Xie, T., Wang, Y., Deng, N., Huang, G., Taghavifar, F., Geng, Y., Liu, N., Kulur, V., Yao, C., Chen, P., et al. (2018). Single-cell deconvolution of fibroblast heterogeneity in mouse pulmonary fibrosis. *Cell Rep.* *22*, 3625–3640. <https://doi.org/10.1016/j.celrep.2018.03.010>.
- Yamaguchi, Y., Hearing, V.J., Itami, S., Yoshikawa, K., and Katayama, I. (2005). Mesenchymal-epithelial interactions in the skin: aiming for site-specific tissue regeneration. *J. Dermatol. Sci.* *40*, 1–9. <https://doi.org/10.1016/j.jdermsci.2005.04.006>.
- Yamamoto, Y., Gotoh, S., Korogi, Y., Seki, M., Konishi, S., Ikeo, S., Sone, N., Nagasaki, T., Matsumoto, H., Muro, S., et al. (2017). Long-term expansion of alveolar stem cells derived from human iPSC cells in organoids. *Nat. Methods* *14*, 1097–1106. <https://doi.org/10.1038/nmeth.4448>.



Yao, C., Guan, X., Carraro, G., Parimon, T., Liu, X., Huang, G., Mulla, A., Soukiasian, H.J., David, G., Weigt, S.S., et al. (2021). Senescence of alveolar type 2 cells drives progressive pulmonary fibrosis. *Am. J. Respir. Crit. Care Med.* *203*, 707–717. <https://doi.org/10.1164/rccm.202004-1274OC>.

Youk, J., Kim, T., Evans, K.V., Jeong, Y.I., Hur, Y., Hong, S.P., Kim, J.H., Yi, K., Kim, S.Y., Na, K.J., et al. (2020). Three-dimensional human alveolar stem cell culture models reveal infection response to

SARS-CoV-2. *Cell Stem Cell* *27*, 905–919.e10. <https://doi.org/10.1016/j.stem.2020.10.004>.

Zepp, J.A., Morley, M.P., Loebel, C., Kremp, M.M., Chaudhry, F.N., Basil, M.C., Leach, J.P., Liberti, D.C., Niethamer, T.K., Ying, Y., et al. (2021). Genomic, epigenomic, and biophysical cues controlling the emergence of the lung alveolus. *Science* *371*, eabc3172. <https://doi.org/10.1126/science.abc3172>.

**Stem Cell Reports, Volume 16**

**Supplemental Information**

**Disease modeling of pulmonary fibrosis using human pluripotent stem cell-derived alveolar organoids**

**Takahiro Suezawa, Shuhei Kanagaki, Keita Moriguchi, Atsushi Masui, Kazuhisa Nakao, Masayasu Toyomoto, Koji Tamai, Ryuta Mikawa, Toyohiro Hirai, Koji Murakami, Masatoshi Hagiwara, and Shimpei Gotoh**



## SUPPLEMENTAL INFORMATION

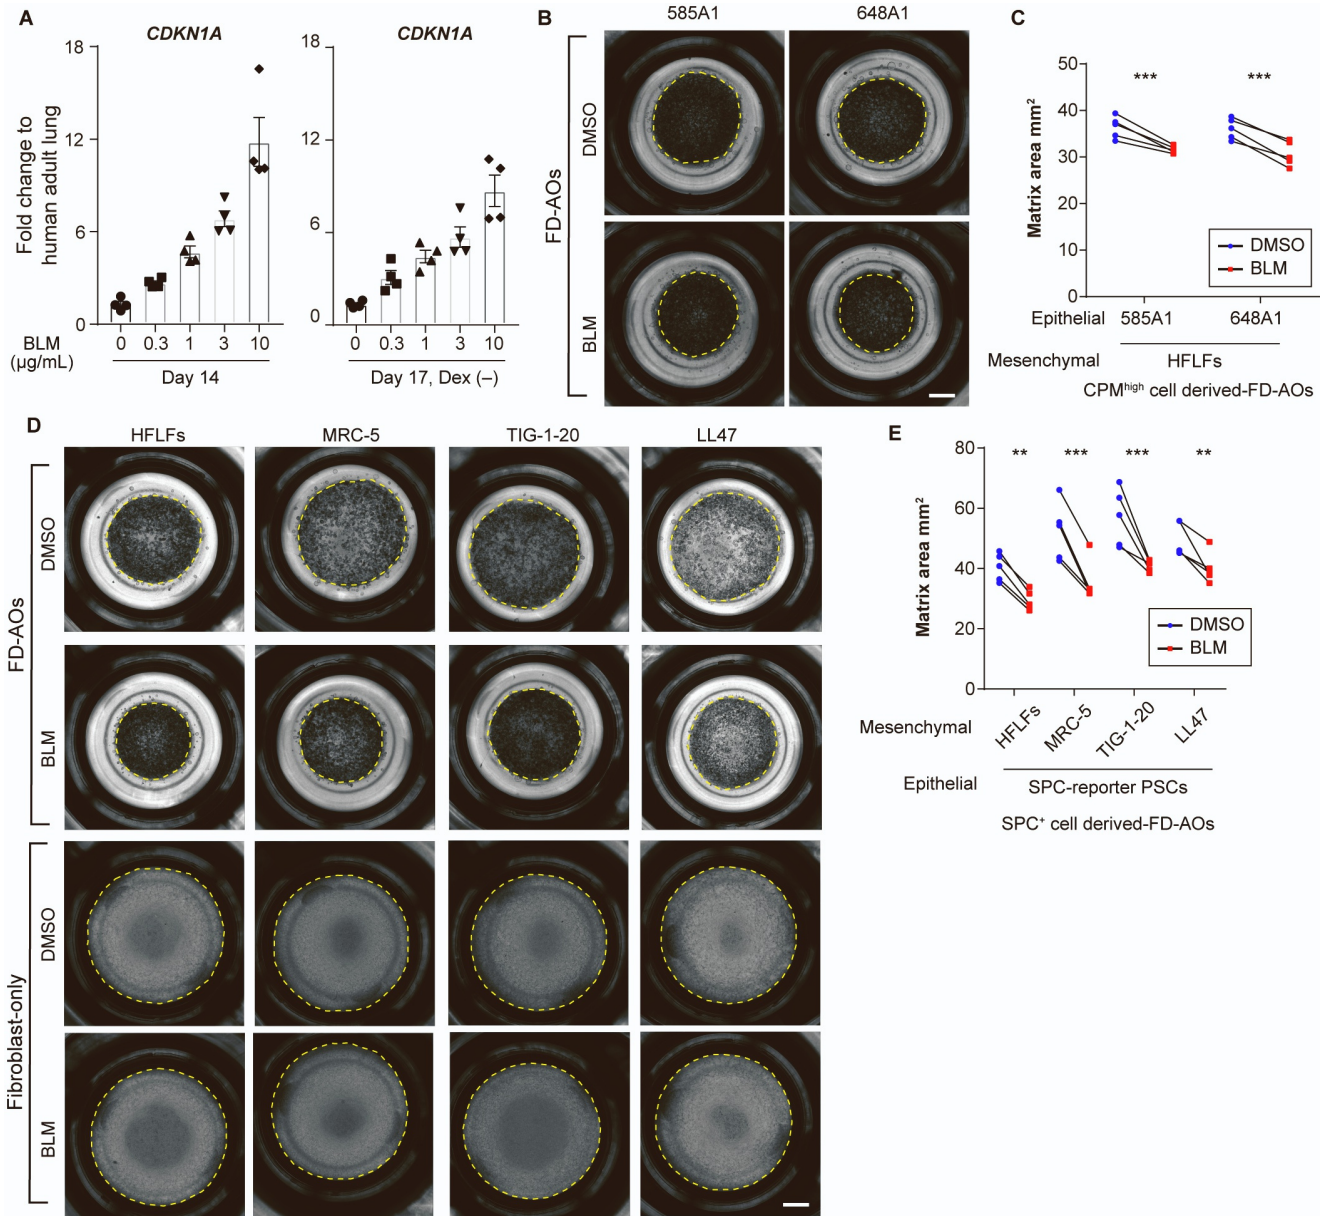

**Figure S1. Optimization of BLM concentration and assay validation using other cell lines. Related to Figure 1.**

(A) Bleomycin (BLM) dose dependency in fibroblast-dependent alveolar organoids (FD-AOs) on Day 14 and 17. Expression levels of *CDKN1A* were evaluated by qRT-PCR. Gene expression in the normalizer (adult lung RNA control) was set at 1. Data are presented as mean  $\pm$  SEM ( $n = 4$  independent experiment). Dex: dexamethasone. (B–E) Whole-well imaging and quantification of the area of cultivation matrices of fibroblast or 3D-cultured fibroblasts on Day 17. Scale bars, 2 mm. Data are mean  $\pm$  SEM ( $n = 5$  independent experiments). Two-way repeated measures ANOVA with Sidak's multiple comparisons test: \*\* $P < 0.01$ , \*\*\* $P < 0.001$ .

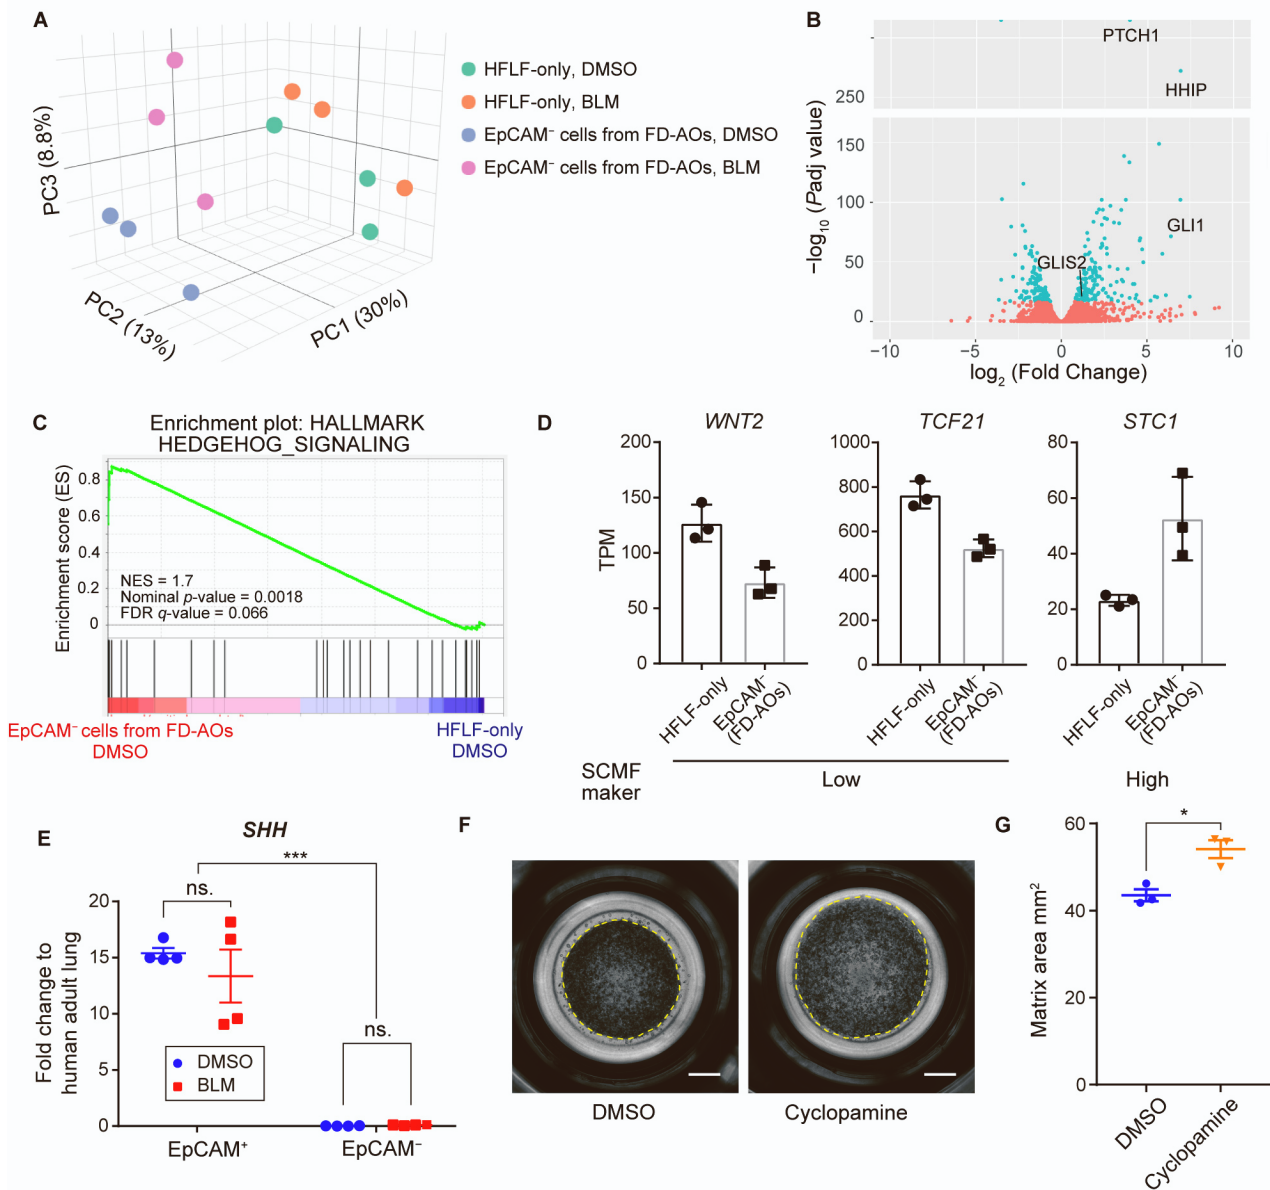

**Figure S2. Hedgehog signal from alveolar epithelial cells contributes to matrix shrinkage of FD-AOs in DMSO-treated conditions. Related to Figure1.**

(A) Principal component analysis (PCA) of the transcriptome of fibroblasts under DMSO and BLM treatment with or without epithelial cells. The  $\log_2$  (TPM values) were used for PCA. (B) Volcano plot obtained from the DESeq2 analysis between fibroblasts from FD-AOs and those from HFLF-only culture. (C) GSEA pre-ranked test to Hallmark\_Hedgehog\_signaling. Data from fibroblasts with or without epithelial cells were used and ranked based on the  $p$ -values calculated by DESeq2. (D) The gene expression of secondary crest myofibroblast (SCMF) markers (Zepp et al., 2021). The SCMF low-expression markers are *WNT2* and *TCF21*; the SCMF high-expression marker is *STC1*. The RNA-seq data with or without epithelial cells were used. (E)

Expression levels of *SHH* in EpCMA<sup>+</sup> and EpCAM<sup>-</sup> cells separated from FD-AOs measured by qRT-PCR. Gene expression in the normalizer (adult lung RNA control) was set at 1. Data are presented as mean  $\pm$  SEM ( $n = 4$  independent experiments). Two-way ANOVA with Sidak's multiple comparisons test: \*\*\* $P < 0.001$ . ns.: not significant. (F and G) Whole-well imaging and quantification of the area of cultivation matrices of FD-AOs on Day 14. FD-AOs were treated with 20  $\mu$ M cyclopamine from Day 11 to 14. Scale bars, 2 mm. Data are presented as mean  $\pm$  SEM ( $n = 3$  independent experiments). Unpaired two-tailed Student's  $t$  test: \* $P < 0.05$ .

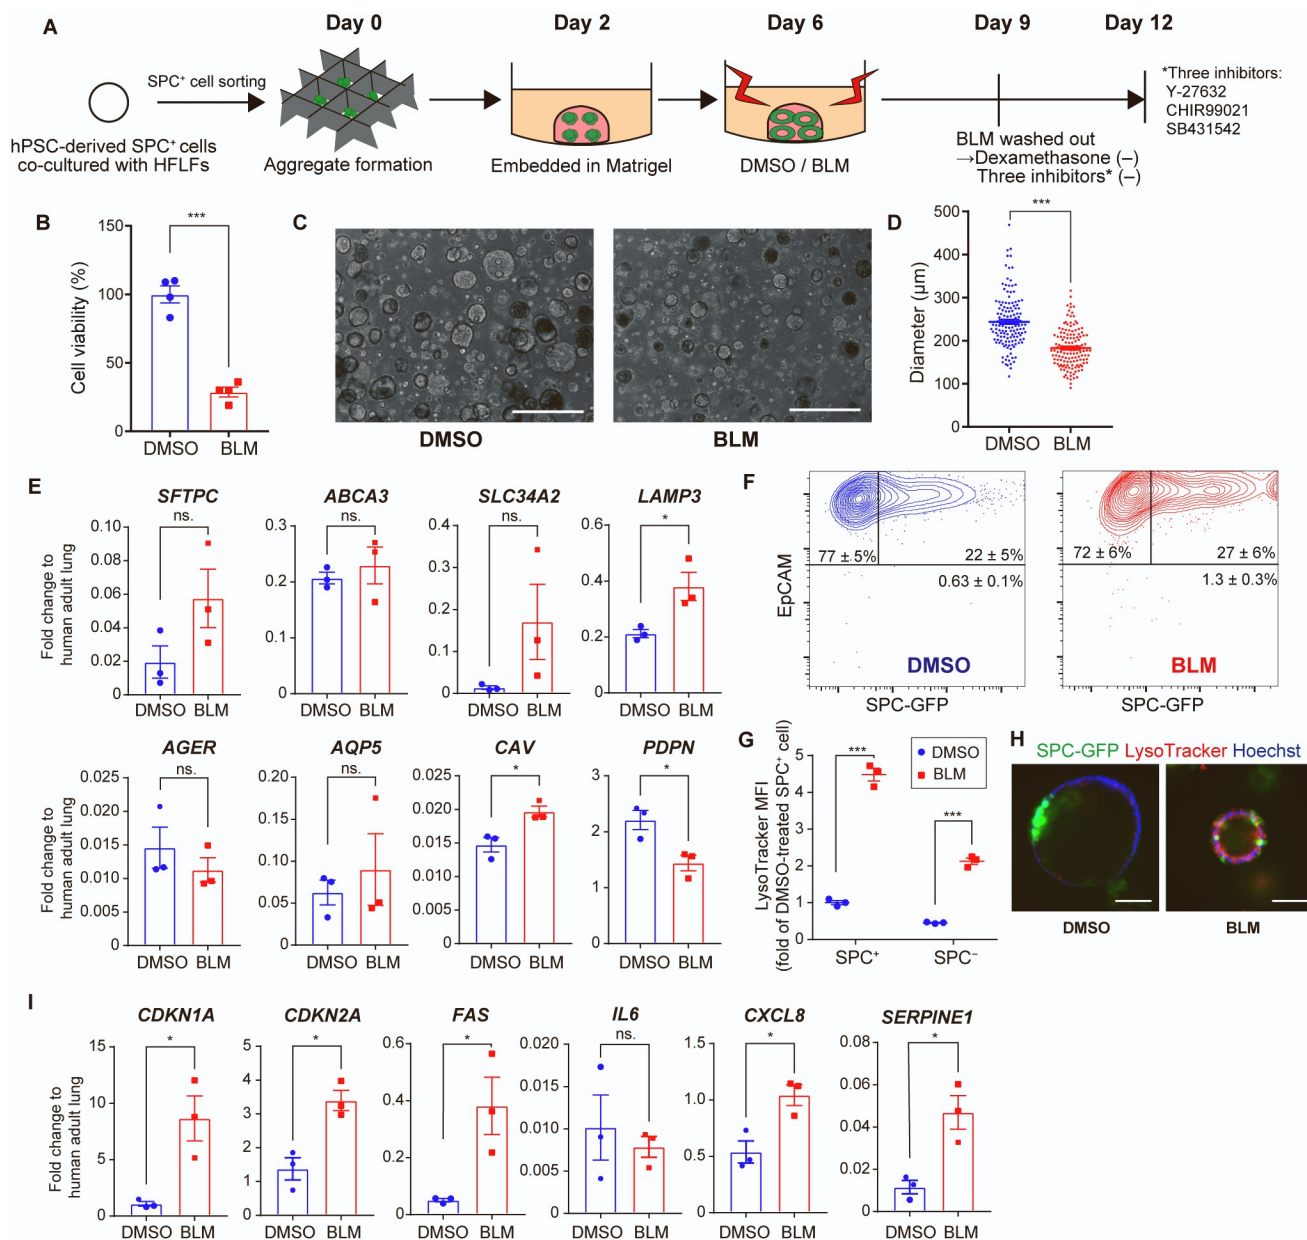

**Figure S3. Response of FF-AOs to BLM treatment. Related to Figures 2 and 4.**

(A) Experimental scheme of BLM treatment of fibroblast-free alveolar organoids (FF-AOs). (B) CellTiter-Glo 3D Cell Viability assay. Data are presented as mean ± SEM ( $n = 4$  independent experiments). Unpaired two-tailed Student's  $t$  test: \*\*\* $P < 0.001$ . (C and D) Quantification of alveolar spheroid diameter. Scale bars, 1000 μm. Data are presented as mean ± SEM ( $n = 140$  spheres from 7 independent experiments). Unpaired two-tailed Student's  $t$  test: \*\*\* $P < 0.001$ . (E) Expression levels of AT2 (*SFTPC*, *ABCA3*, *SLC34A2* and *LAMP3*) and AT1 (*AGER*, *AQP5*, *CAV1* and *PDPN*) cell markers in FF-AOs evaluated by qRT-PCR. Gene expression in the normalizer (adult lung RNA control) was set at 1. Data are presented as mean ± SEM ( $n = 3$ ).

Unpaired two-tailed Student's *t* test: \**P* < 0.05. ns.: not significant. (F and G) Flow cytometric analysis of BLM-treated FF-AOs. Mean fluorescence intensity (MFI) of LysoTracker. Data are mean ± SEM (*n* = 3 independent experiments). Two-way ANOVA with Sidak's multiple comparisons test: \*\*\**P* < 0.001. (H) Live cell imaging of FF-AOs. Green, SPC-GFP; red, LysoTracker; blue, nuclei (Hoechst). Scale bars, 100 μm. (I) Expression levels of senescence markers in FF-AOs evaluated by qRT-PCR. Gene expression in the normalizer (adult lung RNA control) was set at 1. Data are presented as mean ± SEM (*n* = 3). Unpaired two-tailed Student's *t* test: \**P* < 0.05. ns.: not significant.

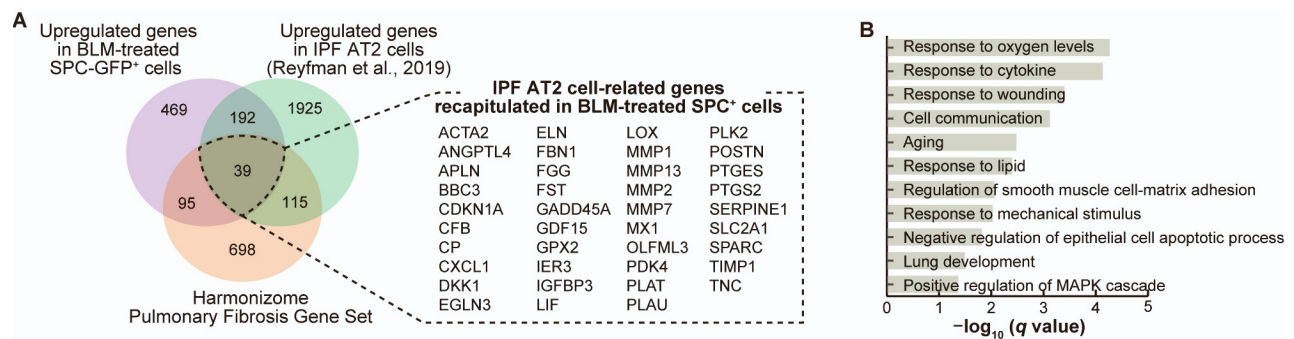

**Figure S4. Transcriptomic comparison of isolated AT2 cells from BLM-treated FD-AOs and those from the IPF lung. Related to Figures 3 and 4.**

(A) Among the 947 genes annotated as “pulmonary fibrosis” in the harmonizome database (Rouillard et al., 2016), we extracted genes that were commonly upregulated in AT2 cells of BLM-treated FD-AOs and the idiopathic pulmonary fibrosis (IPF) lung (Reyffman et al., 2019). The threshold for upregulation was set to  $\log_2(\text{fold change}) > 1$  with adjusted *p*-value < 0.05. (B) GO analysis of the 39 extracted genes.

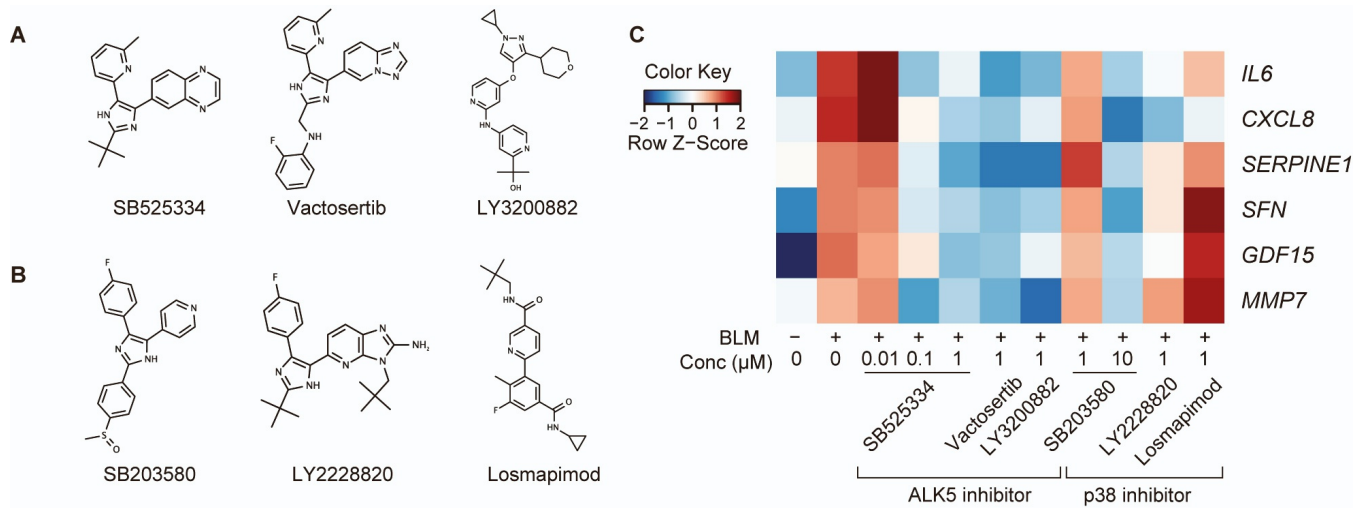

**Figure S5. TGFβ signaling contributes to the pathogenesis of epithelial cells. Related to Figure 5.**

(A) Structures of ALK5 inhibitors. (B) Structures of p38 inhibitors. (C) A validation study of ALK5 and p38 using compounds with the same target but different structures. Heatmap indicating Z-scores of the senescence-associated secretory phenotype (SASP) factors (*IL6*, *CXCL8*, *SERPINE1*) (Coppé et al., 2010) and pre-alveolar type-1 transitional cell state (PATS) markers (*SFN*, *GDF15*, *MMP7*) (Kobayashi et al., 2020). Raw data were measured by qRT-PCR in whole organoids. The Z-scores were calculated using the averaged value of fold change relative to the BLM-treated sample in each experiment ( $n = 3$  independent experiments).

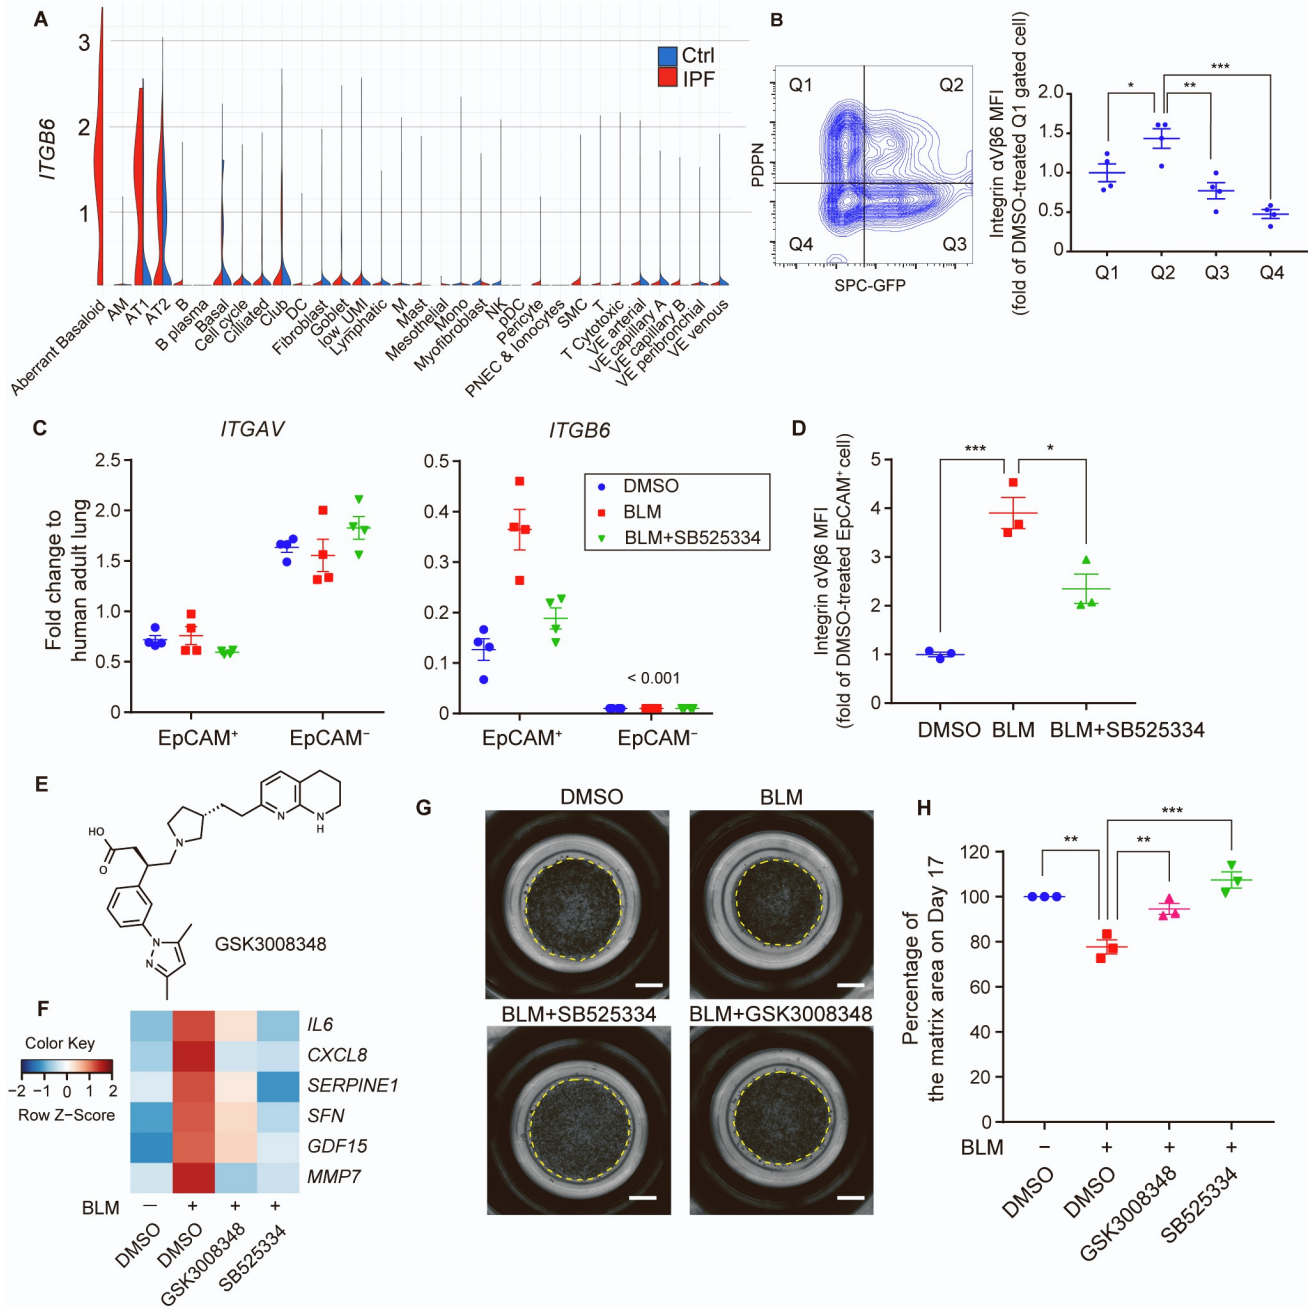

**Figure S6. Integrin  $\alpha$ V $\beta$ 6 is specifically expressed in epithelial cells contributing to BLM-induced fibrogenic changes. Related to Figure 7.**

(A) *ITGB6* expression in IPF using the IPF Cell Atlas ([www.ipfcellatlas.com](http://www.ipfcellatlas.com)) (Neumark et al., 2020). Data set used was Lafyatis. (B) Flow cytometric analysis of DMSO-treated EpCAM<sup>+</sup> cells. Left, gating strategy for isolating each cell population; right, MFI of integrin  $\alpha$ V $\beta$ 6. Data are presented as mean  $\pm$  SEM ( $n = 4$  independent experiments). (C) Expression levels of *ITGAV* and *ITGB6* in EpCAM<sup>+</sup> and EpCAM<sup>-</sup> cells separated from FD-AOs measured by qRT-PCR. Gene expression in the normalizer (adult lung RNA control) was set at 1. Data are presented as mean

± SEM ( $n = 4$  independent experiments). (D) MFI of integrin  $\alpha V\beta 6$  gated on EpCAM<sup>+</sup> cells of FD-AOs in each condition. Data are presented as mean ± SEM ( $n = 3$  independent experiments). (E) Structure of GSK3008348, an integrin  $\alpha V\beta 6$  antagonist. (F) Heatmap indicating Z-scores of the SASP and PATS genes. Raw data were measured by qRT-PCR in whole organoids. The Z-scores were calculated using the averaged value of fold change relative to the BLM-treated sample in each experiment ( $n = 3$  independent experiment). FD-AOs was treated with BLM from Day 11 to 14, and with 1  $\mu$ M GSK3008348 from Day 14 to 17. (G) Whole-well imaging of cultivation matrices on Day 17. Scale bars, 2 mm. (H) Quantification of matrix area. Data are presented as mean ± SEM ( $n = 3$  independent experiments). One-way ANOVA with Tukey's multiple comparisons test: \* $P < 0.05$ , \*\* $P < 0.01$ , \*\*\* $P < 0.001$ .

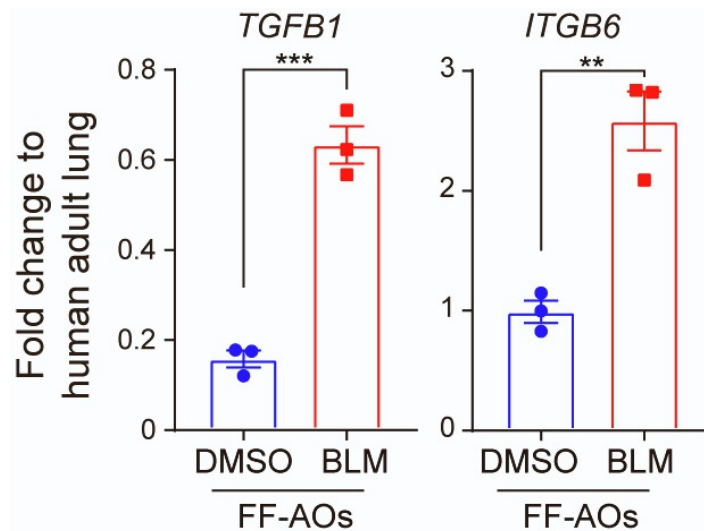

**Figure S7. BLM-treatment activates TGF $\beta$  signaling in FF-AOs. Related to Figure 7.**

FF-AOs were treated with BLM form Day 6 to 9 and analyzed on Day 12. *TGFB1* and *ITGB6* in FF-AOs were evaluated by qRT-PCR. Gene expression in the normalizer (adult lung RNA control) was set at 1. Data are presented as mean ± SEM ( $n = 3$ ). Unpaired two-tailed Student's *t* test: \*\* $P < 0.01$ , \*\*\* $P < 0.001$ .



**Table S1 (Separate file). RNA-seq processed data of fibroblasts under DMSO and BLM treatment with or without epithelial cells. Related to Figure 1.**

**Table S2 (Separate file). RNA-seq processed data of SPC<sup>+</sup> cells under DMSO and BLM treatment. Related to Figures 3 and 4.**

**Table S3. Compounds for screening. Related to Figure 4.**

| <b>Compound name</b> | <b>Vendor</b>           | <b>Concentration (μM)</b> |
|----------------------|-------------------------|---------------------------|
| Nintedanib           | Cayman CHEMICAL         | 1                         |
| Pirfenidone          | Tokyo Chemical Industry | 500                       |
| Rapamycin            | Nacalai Tesque          | 0.1                       |
| Tofacitinib          | MedChemExpress          | 1                         |
| Metformin            | Fujifilm Wako           | 1000                      |
| SB203580             | Adipogen                | 1 and 10                  |
| Tanzisertib          | MedChemExpress          | 1                         |
| CI-1040              | MedChemExpress          | 1                         |
| SB525334             | MedChemExpress          | 0.01, 0.1 and 1           |
| DAPT                 | Fujifilm Wako           | 10                        |
| CHIR99021            | Axon Medchem            | 3                         |
| XAV939               | Sigma-Aldrich           | 10                        |
| Dexamethasone        | Sigma-Aldrich           | 0.05                      |
| Vactosertib          | MedChemExpress          | 1                         |
| LY3200882            | MedChemExpress          | 1                         |
| LY2228820            | ChemScene               | 1                         |
| Losmapimod           | MedChemExpress          | 1                         |
| GSK3008348           | MedChemExpress          | 1                         |
| Cyclopamine          | Cayman CHEMICAL         | 20                        |

**Table S4. Secreted molecules in the culture supernatant of FD-AOs on Day 17. Related to Figures 5 and 7.**

Data are presented as mean  $\pm$  SEM ( $n = 5$  independent experiments).

| Stimulus                 | MMP7 (pg/mL) | Active TGF $\beta$ 1 (pg/mL) | Total TGF $\beta$ 1 (pg/mL) |
|--------------------------|--------------|------------------------------|-----------------------------|
| DMSO                     | 163 $\pm$ 19 | nd (< 2 pg/mL)               | 220 $\pm$ 29                |
| BLM                      | 262 $\pm$ 46 | nd (< 2 pg/mL)               | 178 $\pm$ 37                |
| BLM + 1 $\mu$ M SB525334 | 121 $\pm$ 20 | nt                           | nt                          |

Definition of abbreviations: 'nd' not detected; 'nt' not tested

**Table S5 (Separate file). Proteomic data of whole cultivation matrices including cells under DMSO, BLM, and BLM with SB525334 treatment. Related to Figure 7.**

**Table S6. Primers for TaqMan qPT-PCR**

| Gene name       | Taqman ID     |
|-----------------|---------------|
| <i>18S rRNA</i> | Hs99999901_s1 |
| <i>CDKN1A</i>   | Hs00355782_m1 |
| <i>SFTPC</i>    | Hs00161628_m1 |
| <i>IL6</i>      | Hs00985639_m1 |
| <i>CXCL8</i>    | Hs00174103_m1 |
| <i>SERPINE1</i> | Hs00167155_m1 |
| <i>CDKN2A</i>   | Hs00233365_m1 |
| <i>FAS</i>      | Hs00236330_m1 |
| <i>SFN</i>      | Hs00968567_s1 |

| Gene name    | Taqman ID     |
|--------------|---------------|
| <i>GDF15</i> | Hs00171132_m1 |
| <i>MMP7</i>  | Hs01042796_m1 |
| <i>ACTA2</i> | Hs00426835_g1 |
| <i>CNN1</i>  | Hs00959434_m1 |
| <i>MYH11</i> | Hs00975796_m1 |
| <i>TAGLN</i> | Hs01038777_g1 |
| <i>ITGAV</i> | Hs00233808_m1 |
| <i>ITGB6</i> | Hs00168458_m1 |
| <i>TGFB1</i> | Hs99999918_m1 |

**Table S7. Primer sequences for SYBR green qRT-PCR**

| Gene name      | Forward primer sequence | Reverse primer sequence |
|----------------|-------------------------|-------------------------|
| <i>SHH</i>     | CCGAGCGATTTAAGGAACTCACC | AGCGTTCAACTTGTCCTTACACC |
| <i>ABCA3</i>   | TCTCCTTCAGCTTCATGGTCAG  | TGGCTCAGAGTCATCCAGTTG   |
| <i>SLC34A2</i> | TCGCCACTGTCATCAAGAAG    | CTCTGTACGATGAAGGTCATGC  |
| <i>LAMP3</i>   | ACCGATGTCCAACCTTCAAGC   | TGACACCTTAGGCCGGATTTT   |
| <i>AQP5</i>    | CTGTCCATTGGCCTGTCTGTC   | GGCTCATACGTGCCTTTGATG   |
| <i>AGER</i>    | GCCACTGGTGCTGAAGTGTA    | TGGTCTCCTTTCCATTCCTG    |
| <i>CAV1</i>    | AGGGCAACATCTACAAGCCC    | GCCGTCAAACACTGTGTGTCC   |
| <i>PDPN</i>    | TCCAGGAACCAGCGAAGAC     | CGTGGACTGTGCTTTCTGA     |
| <i>KRT17</i>   | CTACAGCCAGTACTACAGGACA  | AACTTGGTGCGGAAGTCATCA   |

## SUPPLEMENTAL EXPERIMENTAL PROCEDURES

### Differentiation of hPSCs into NKX2-1<sup>+</sup> lung progenitor cells

The differentiation of hPSCs was performed as previously described (Yamamoto et al., 2017). To differentiate into definitive endoderm (DE), hPSCs were seeded on Geltrex-coated (Thermo Fisher Scientific) plates in RPMI medium (Nacalai Tesque) containing 100 ng/mL activin A (Peprotech), 1  $\mu$ M CHIR99021 (Axon Medchem), 10  $\mu$ M Y-27632 (LC Laboratories), 2% B-27 supplement (Thermo Fisher Scientific), and 50 U/mL penicillin–streptomycin (P–S; Thermo Fisher Scientific). Sodium butyrate (Fujifilm Wako) was added to a final concentration of 0.25 mM on the next day. From the second day, the cells were cultured in RPMI medium containing 100 ng/mL activin A, 1  $\mu$ M CHIR99021, 0.125 mM sodium butyrate, 2% B-27 supplement, and 50 U/mL P–S for 4 days. In the following steps, DMEM/F12 (Thermo Fisher Scientific) containing GlutaMAX (Thermo Fisher Scientific), 2% B-27 supplement, 50 U/ml P–S, 0.05 mg/mL L-ascorbic acid (Fujifilm Wako), and 0.4 mM monothioglycerol (Fujifilm Wako) was used as the basal medium. The DE cells were cultured in the basal medium supplemented with 100 ng/mL noggin (Proteintech) and 10  $\mu$ M SB431542 (Fujifilm Wako) for 4 days to differentiate into anterior foregut endoderm (AFE) cells. The AFE cells were cultured in the basal medium supplemented with 3  $\mu$ M CHIR99021, 0.05  $\mu$ M all-trans retinoic acid (Sigma-Aldrich) and 20 ng/mL BMP4 (Proteintech) for 4 days to differentiate into ventralized anterior foregut endoderm (VAFE) cells. For efficient distalization of VAFE cells, the cells were cultured in basal medium supplemented

with 3  $\mu\text{M}$  CHIR99021, 10 ng/mL FGF10 (PeproTech), 10 ng/mL KGF (PeproTech) and 20  $\mu\text{M}$  DAPT (Fujifilm Wako) for 7 days. After a 21-day differentiation step, NKX2-1<sup>+</sup> lung progenitor cells were isolated using FACS with mouse anti-human CPM antibody (1:100, Fujifilm Wako #014-27501) and Alexa Fluor 647 conjugated donkey anti-mouse IgG antibody (1:100, Thermo Fisher Scientific #A-31571).

### **Induction of AT2 cells in FD-AOs**

FD-AOs were cultured in DCIK medium; Ham's F12 (Fujifilm Wako) containing 50 nM dexamethasone (Sigma-Aldrich), 100  $\mu\text{M}$  8-Br-cAMP (Biolog Life Science Institute), 100  $\mu\text{M}$  3-isobutyl-1-methylxanthine (Fujifilm Wako), 10 ng/mL KGF, 1% B-27 supplement, 0.25% BSA (Thermo Fisher Scientific), 15 mM HEPES (Thermo Fisher Scientific), 0.8 mM CaCl<sub>2</sub> (Fujifilm Wako), 0.1% ITS premix (Corning), and 50 U/mL P-S. Sorted  $1 \times 10^4$  CPM<sup>high</sup> cells were mixed with  $5 \times 10^5$  precultured HFLFs in 200  $\mu\text{L}$  of 50% Growth Factor Reduced Matrigel (Corning) diluted with DCIK medium supplemented with 10  $\mu\text{M}$  Y-27632. Mixed cells (200  $\mu\text{L}$ ) were placed on a 12-well cell culture insert (Corning), and 1 mL of DCIK medium containing 10  $\mu\text{M}$  Y-27632 was added to the lower chamber. FD-AOs was cultured for 14 days; the medium in the lower chamber was replaced with DCIK medium every 2 to 3 days.

### **Flow cytometry (FCM)**

Cell suspension, washing, and antibody dilution were performed with flow cytometry buffer; PBS containing 1% BSA and 10  $\mu\text{M}$  Y-27632. Dissociated cells were fixed with 4% paraformaldehyde/PBS (Nacalai Tesque) and permeabilized with ice-cold methanol for intracellular staining. The following primary antibodies and staining reagents were used. Lyso Tracker Red DND-99 (1:10,000, Thermo Fisher Scientific #L7528), APC-conjugated mouse anti-human EpCAM antibody (1:100, Miltenyi Biotec Inc #130-113-260), rat anti-human podoplanin antibody (1:100, Thermo Fisher Scientific #16-9381-81), goat anti-human EpCAM antibody (1:100, Bio-Techne #AF960), mouse anti-mouse p21 antibody (1:25, Santa Cruz Biotechnology #sc-6246), mouse anti-human integrin  $\beta 6$  antibody (1:100, Bio-Techne #MAB4155), and purified mouse IgG2b isotype control antibody (1:100, BioLegend #402201). After being washed twice with flow cytometry buffer, the cells were stained with the following secondary antibodies. DyLight 550 conjugated donkey anti-rat IgG antibody (1:100, Thermo Fisher Scientific #SA5-10027), Alexa Fluor 647 conjugated donkey anti-goat IgG antibody (1:500, Thermo Fisher

Scientific #A-21447), Brilliant Violet 421 conjugated donkey anti-goat IgG antibody (1:100, Jackson Immuno Research #705-675-147), and Alexa Fluor 546 conjugated donkey anti-mouse 546 antibody (1:500, Thermo Fisher Scientific #A10036).

### **qRT-PCR**

The PureLink RNA Mini Kit (Thermo Fisher Scientific) or RNeasy Micro Kit (Qiagen) was used to extract total RNA. Extracted total RNA was reverse-transcribed using ReverTra Ace qPCR RT Master Mix with gDNA Remover (Toyobo) according to the manufacturer's protocol. The primers used in this report are described in Tables S6 and S7. qPCR was performed using Power SYBR Green Master Mix (Thermo Fisher Scientific) or TaqPath qPCR Master Mix, CG (Thermo Fisher Scientific) on the StepOnePlus Real-Time PCR System (Thermo Fisher Scientific). The gene expression was normalized to the Eukaryotic 18S rRNA and compared with the human adult lung 5 donor pool (BioChain #R1234152-P, lot A811037) or each control. In compound screening using whole organoids of FD-AOs, the fold change relative to BLM-treated sample in each experiment was averaged and  $\log_2$  transformed. The transformed value was visualized using the R package "gplots".

### **Live cell imaging**

Images were obtained using a BZ-X710 microscope (Keyence). Images were jointed using BZ-X Analyzer (Keyence) and the whole matrix area was measured using the Image J software program (National Institutes of Health) (Schindelin et al., 2012). For quantification of the diameter and thickness of alveolar spheroids in each condition, 20 spheroids were randomly selected in each experiment and measured using BZ-X Analyzer.

### **Isolation of epithelial cells and fibroblasts from FD-AOs**

Matrigel-embedded cells were carefully dissociated at 37 °C for 15 min via gentle pipetting with 0.1% Trypsin–EDTA (Thermo Fisher Scientific). Dissociated cells were stained with mouse anti-human EpCAM antibody (1:100, Santa Cruz Biotechnology #sc-66020). Magnetic-activated cell sorting (MACS) with goat anti-mouse IgG microbeads (1:5, Miltenyi Biotec Inc #130-048-401) was performed to separate epithelial cells (EpCAM<sup>+</sup>) and fibroblasts (EpCAM<sup>-</sup>) for the downstream analysis.

## **RNA-seq**

The RNeasy Micro Kit was used to extract total RNA according to manufacturer's protocol. The RNA integrity number of each sample was confirmed to be over 8 using a 2100 BioAnalyser (Agilent Technologies). Sequence libraries of the fibroblast RNA were prepared using the NEBNext Ultra RNA LP Kit (New England Biolabs). For an analysis of GFP-SPC<sup>+</sup> cells, 10 ng of total RNA was reverse-transcribed and amplified with 8 cycles using SMART-Seq v4 Ultra Low Input RNA Kit for Sequencing (Clontech Laboratories). The amplified cDNAs were used to prepare sequence libraries using Nextera XT DNA Library Preparation Kit (Illumina). The library sequence was performed using 150 bp paired-end method by NovaSeq 6000 (Illumina).

## **Bioinformatic analysis of RNA-seq data**

Sequenced reads of the fibroblasts were trimmed using fastp (Chen et al., 2018), and the trimmed reads were aligned to GRCh38 using STAR 2.7.3a (Dobin et al., 2013). Transcripts per million (TPM) values were calculated using RSEM (Li and Dewey, 2011). Sequencing reads of SPC-GFP<sup>+</sup> cells were aligned to GRCh37 using STAR 2.6.0c, and TPM values were calculated using Genedata Profiler Genome (Genedata). Low expression genes with average TPM values among the comparison data set less than 1 were excluded for downstream analyses. The principal component analysis (PCA) of  $\log_2$  (TPM + 0.01) was performed using the R function "prcomp" and visualized using the R package "plotly". The R package DESeq2 (Love et al., 2014) was used for identification of Differentially Expressed Genes (DEGs). Volcano plots were visualized using the R package "ggplot2" and "ggrepel". Gene set enrichment analysis (GSEA) (Subramanian et al., 2005) was performed using the genes ordered by the *p*-values calculated by DESeq2. Enrichment analysis for gene ontology (GO) based on biological processes was performed using the PANTHER online software (Mi et al., 2021). A heatmap using  $\log_2$  (TPM + 0.01) or  $\log_2$  (fold change calculated by DESeq2) was visualized by the R package "gplots".

## **Immunofluorescence analysis (IFA)**

FD-AOs were fixed with 4% paraformaldehyde/PBS. Blocking and antibody dilution were performed using blocking buffer (PBS containing 5% normal donkey serum [EMD-Millipore] and 1% BSA [Sigma-Aldrich]) unless otherwise stated. Paraffin-embedded specimens were sectioned into 3- $\mu$ m slices, deparaffinized, and hydrated using the standard procedure. Antigen retrieval was performed with 10 mM sodium citrate (pH 6.0; Fujifilm Wako) at 98 °C for 30 min.

The retrieved sections were permeabilized with PBS containing 0.2% Triton X-100 (Nacalai Tesque), immersed in the blocking buffer, and stained with the following primary antibodies diluted with Can Get Signal Immunostain Enhancer Solution B (Toyobo): goat anti-human EpCAM antibody (1:100, Bio-Techne #AF960), rabbit anti-MYH11 antibody (1:100, Abcam #ab133567), goat anti-human RAGE antibody (1:100, Bio-Techne #AF1145), and rabbit anti-GFP antibody (1:200, Cell Signaling technology #2956). For cryosections (10  $\mu$ m), fixed specimens were incubated in 30% sucrose (Nacalai Tesque) at 4 °C overnight, embedded in optimal cutting temperature compound (Sakura Finetek) and frozen at -70 °C. Cryosections were permeabilized with PBS containing 0.2% Triton X-100 or ice-cold methanol, blocked with blocking buffer, and stained with the following primary antibodies: goat anti-human SFN antibody (1:100, Abcam #ab77187) diluted with Can Get Signal immunostain Enhancer Solution B, mouse anti-human p53 antibody (1:100, Santa Cruz Biotechnology #sc-126), chicken anti-GFP antibody (1:500, Aves Labs #GFP-1020), mouse anti-mouse p21 antibody (1:25, Santa Cruz Biotechnology #sc-6246), goat anti-human EpCAM antibody (1:100, Bio-Techne #AF960), mouse anti-human EpCAM antibody (1:100, Santa Cruz Biotechnology #sc-66020), and goat anti-human RAGE antibody (1:100, Bio-Techne #AF1145). For secondary staining, Hoechst-33342 (1:1,000, Dojindo Molecular Technologies Inc.) and the following secondary antibodies were used: Alexa Fluor 647 conjugated donkey anti-goat IgG (1:500, Thermo Fisher Scientific #A-21447), Alexa Fluor 546 conjugated donkey anti-rabbit IgG (1:500, Thermo Fisher Scientific #A-10040), Alexa Fluor 488 conjugated donkey anti-rabbit IgG (1:500, Thermo Fisher Scientific #A-21206), Alexa Fluor 546 conjugated donkey anti-mouse IgG (1:500, Thermo Fisher Scientific #A-10036), and Alexa Fluor 488 conjugated donkey anti-chicken IgY (1:500, Jackson Immuno Research #703-485-155). Stained sections were embedded with ProLong Gold Antifade Mountant (Thermo Fisher Scientific) and imaged using a TCS SP8 confocal microscope (Leica Microsystems).

### **Quantification of lineage marker-positive areas of epithelial cells in FD-AOs**

Images of cryosections obtained with a TCS SP8 confocal microscope were analyzed using the Image J software program. Binarized images were processed using the close function with 5 iterations, and debris smaller than 10 pixel units were eliminated. The SPC-GFP<sup>+</sup>, AGER<sup>+</sup>, and SPC-GFP<sup>+</sup>AGER<sup>+</sup> area of EpCAM<sup>+</sup> area was measured, respectively.

### **BLM treatment assay of FF-AOs**

Prior to BLM treatment, FF-AOs were prepared in DCIK medium supplemented with 10  $\mu\text{M}$  Y-27632, 3  $\mu\text{M}$  CHIR99021, and 10  $\mu\text{M}$  SB431542. First,  $2 \times 10^5$  SPC-GFP<sup>+</sup> cells isolated from FD-AOs were suspended in 250  $\mu\text{L}$  of the medium, seeded onto an Elplasia 96 well square bottom plate (Corning) coated with poly(2-hydroxyethyl methacrylate) (Sigma-Aldrich) and cultured for 2 days to form aggregates in each well. The aggregates were gently resuspended with 60 or 120  $\mu\text{L}$  of Growth Factor Reduced Matrigel, and 20  $\mu\text{L}$  of the suspension was dispensed into each well of a 12 well culture plate (60  $\mu\text{L}$  for live cell imaging and RNA extraction; 120  $\mu\text{L}$  for cell viability assay and flow cytometry). After the Matrigel solidified, 1 mL of the culture medium was added. The culture medium was replaced every 2 days until BLM treatment. Then, SPC-GFP<sup>+</sup> cell-derived FF-AOs were treated with 3  $\mu\text{g}/\text{mL}$  BLM (Nippon Kayaku) from Day 6 to 9. BLM was washed out with PBS on Day 9, and the FF-AOs were cultured in dexamethasone-free DCIK medium without any of Y-27632, CHIR99021, or SB431542 from Day 9 to 12.

### **Measurement of cell viability of FF-AOs.**

CellTiter-Glo 3D Cell Viability Assay (Promega) was used for measuring the viability of FF-AOs. FF-AOs were lysed with CellTiter-Glo 3D Cell Viability Assay reagent, transferred to a 96 well white clear bottom plate (Corning), and incubated for 30 min. Luminescence was measured using ARVO X5 (PerkinElmer).

### **Transmission electron microscopy**

FD-AOs were fixed in 0.1M phosphate buffer (pH 7.4) containing 2.5% glutaraldehyde, 2% paraformaldehyde, 2% osmium tetroxide, 0.1% picric acid and 4% sucrose, as described previously (Gotoh *et al.*, 2014). En bloc staining was performed using 1% uranyl acetate. After the dehydration step, specimens were embedded in Epon 812 (Nacalai Tesque). Ultrathin sections were stained using uranyl acetate and lead citrate and examined by transmission electron microscopy (Hitachi #H-7650).

### **LysoTracker staining for live cell imaging**

LysoTracker Red DND-99 (1:10,000) and Hoechst-33342 (1:1,000) were diluted with dexamethasone-free DCIK medium to prepare the staining solution. FF-AOs were stained with the staining solution and incubated for 1 h under 5% CO<sub>2</sub> at 37 °C. HBSS (+) (NacalaiTesque)



supplemented with 1%BSA was used for washing and imaging. Images were obtained using a BZ-X710 microscope.

### **Measurement of SA- $\beta$ -gal activity**

The 96-Well Cellular Senescence Assay (Cell Biolabs) was used for measuring SA- $\beta$ -gal activity. The activity was measured according to manufacturer's protocol. The activity was corrected by the protein concentration measured by a BCA protein assay kit (Thermo Fisher Scientific).

### **Measurement of MMP7 and TGF $\beta$ 1 in the culture supernatant**

The culture medium in the lower chamber of FD-AOs on Day 17 was collected and centrifuged at 1,000 x g for 10 min. The retrieved supernatant was stored at -70 °C until measurement. ELISA Kits for MMP7 (Bio-Techne #DMP700) and TGF $\beta$ 1 (Bio-Techne #DB100B) were used for quantification.

### **Proteomic analysis**

FD-AOs were washed with PBS and were flash frozen in liquid nitrogen. Each sample was lysed with 100  $\mu$ L of Lysis Buffer (10 mM Tris-HCl pH 8.0 [Cytiva], 7 M urea [Cytiva], 2 M thiourea [Fujifilm Wako], 5 mM magnesium acetate [Fujifilm Wako], and 4% [w/v] CHAPS [Dojindo Molecular Technologies Inc.] with Complete Protease Inhibitor Cocktail [Roche]). After sonication, each lysed sample was centrifuged at 20,000 x g for 30 min and the supernatant was collected. Approximately 100  $\mu$ L of reducing buffer (10 mM DTT [Cytiva], 100 mM ammonium bicarbonate [Fujifilm Wako]) were added, and the mixture was incubated at 57 °C for 30 min. Next, 100  $\mu$ L of alkylation buffer (50 mM iodoacetamide [Sigma-Aldrich] and 100 mM ammonium bicarbonate) were added, and the mixture was incubated for 30 min. Then, 100  $\mu$ L of Sequencing Grade Modified Trypsin (Promega) and 100  $\mu$ L of 50 mM ammonium bicarbonate were added, and the mixture was incubated at 30 °C for 16 h. The digested solution was dried in a centrifugal concentrator (TOMY #CC-105). Subsequently, 30  $\mu$ L of 0.1% formic acid (Fujifilm Wako) was added and mixed by vortex. Each mixed sample was centrifuged at 20,000 x g for 10 min, and the supernatant was collected. Nanoscale liquid crystal-tandem mass spectrometric (nano LC-MS/MS) analysis was performed using the UltiMate 3000 liquid chromatograph (Thermo Fisher Scientific) and the Q-Exactive Plus mass spectrometer (Thermo Fisher Scientific). After a database search was conducted with the Mascot software program (Matrix Science), the results

were exported and analyzed with Scaffold (Proteome Software). A BLIB file was exported from Scaffold to obtain the database for data independent acquisition (DIA) analysis. For DIA analysis, nano LC–MS/MS measurement was performed twice on each sample. The acquired MS/MS data were annotated to human proteins by Uni-Prot (Consortium, 2019), and quantitative comparative analysis was performed using the Scaffold DIA software program (Proteome Software). Detected proteins with false discovery rate < 0.01 were analyzed, and the threshold for upregulation was set to  $\log_2$  (fold change) > 0.4 ( $n = 2$  technical replicates). Pathway enrichment analysis of 427 proteins up-regulated by BLM treatment was conducted using the online Reactome software (Jassal et al., 2020).

### **SUPPLEMENTAL REFERENCES**

Chen, S., Zhou, Y., Chen, Y., and Gu, J. (2018). fastp: an ultra-fast all-in-one FASTQ preprocessor. *Bioinformatics* 34, i884-i890.

Consortium, U. (2019). UniProt: a worldwide hub of protein knowledge. *Nucleic Acids Res* 47, D506-d515.

Coppé, J.P., Desprez, P.Y., Krtolica, A., and Campisi, J. (2010). The senescence-associated secretory phenotype: the dark side of tumor suppression. *Annu Rev Pathol* 5, 99-118.

Dobin, A., Davis, C.A., Schlesinger, F., Drenkow, J., Zaleski, C., Jha, S., Batut, P., Chaisson, M., and Gingeras, T.R. (2013). STAR: ultrafast universal RNA-seq aligner. *Bioinformatics* 29, 15-21.

Jassal, B., Matthews, L., Viteri, G., Gong, C., Lorente, P., Fabregat, A., Sidiropoulos, K., Cook, J., Gillespie, M., Haw, R., et al. (2020). The reactome pathway knowledgebase. *Nucleic Acids Res* 48, D498-d503.

Kobayashi, Y., Tata, A., Konkimalla, A., Katsura, H., Lee, R.F., Ou, J., Banovich, N.E., Kropski, J.A., and Tata, P.R. (2020). Persistence of a regeneration-associated, transitional alveolar epithelial cell state in pulmonary fibrosis. *Nat Cell Biol* 22, 934-946.

Li, B., and Dewey, C.N. (2011). RSEM: accurate transcript quantification from RNA-Seq data with or without a reference genome. *BMC Bioinformatics* 12, 323.

Love, M.I., Huber, W., and Anders, S. (2014). Moderated estimation of fold change and dispersion for RNA-seq data with DESeq2. *Genome Biol* 15, 550.

Mi, H., Ebert, D., Muruganujan, A., Mills, C., Albou, L.P., Mushayamaha, T., and Thomas, P.D. (2021). PANTHER version 16: a revised family classification, tree-based classification tool, enhancer regions and extensive API. *Nucleic Acids Res* 49, D394-d403.

Neumark, N., Cosme, C., Jr., Rose, K.A., and Kaminski, N. (2020). The Idiopathic Pulmonary Fibrosis Cell Atlas. *Am J Physiol Lung Cell Mol Physiol* *319*, L887-L893.

Reyfman, P.A., Walter, J.M., Joshi, N., Anekalla, K.R., McQuattie-Pimentel, A.C., Chiu, S., Fernandez, R., Akbarpour, M., Chen, C.I., Ren, Z., et al. (2019). Single-Cell Transcriptomic Analysis of Human Lung Provides Insights into the Pathobiology of Pulmonary Fibrosis. *Am J Respir Crit Care Med* *199*, 1517-1536.

Rouillard, A.D., Gundersen, G.W., Fernandez, N.F., Wang, Z., Monteiro, C.D., McDermott, M.G., and Ma'ayan, A. (2016). The harmonizome: a collection of processed datasets gathered to serve and mine knowledge about genes and proteins. *Database (Oxford)* *2016*.

Subramanian, A., Tamayo, P., Mootha, V.K., Mukherjee, S., Ebert, B.L., Gillette, M.A., Paulovich, A., Pomeroy, S.L., Golub, T.R., Lander, E.S., et al. (2005). Gene set enrichment analysis: a knowledge-based approach for interpreting genome-wide expression profiles. *Proc Natl Acad Sci U S A* *102*, 15545-15550.

Yamamoto, Y., Gotoh, S., Korogi, Y., Seki, M., Konishi, S., Ikeo, S., Sone, N., Nagasaki, T., Matsumoto, H., Muro, S., et al. (2017). Long-term expansion of alveolar stem cells derived from human iPS cells in organoids. *Nat Methods* *14*, 1097-1106.

Zepp, J.A., Morley, M.P., Loebel, C., Kremp, M.M., Chaudhry, F.N., Basil, M.C., Leach, J.P., Liberti, D.C., Niethamer, T.K., Ying, Y., et al. (2021). Genomic, epigenomic, and biophysical cues controlling the emergence of the lung alveolus. *Science* *371*.
